# Supplementary material for: Reappraisal of previously reported meta-analyses on antibiotic prophylaxis for low-risk laparoscopic cholecystectomy: an overview of systematic reviews
Source: PubMed Central journal article supplement — BMJ Open. 2018 Mar 16;8(3):e016666. doi: 10.1136/bmjopen-2017-016666 (PMC5857705; doi:10.1136/bmjopen-2017-016666), 2018-03-16
Supplement: bmjopen-2017-016666.draft_revisions.pdf [file bmjopen-2017-016666.draft_revisions.pdf]

# BMJ Open

BMJ Open is committed to open peer review. As part of this commitment we make the peer review history of every article we publish publicly available.

When an article is published we post the peer reviewers' comments and the authors' responses online. We also post the versions of the paper that were used during peer review. These are the versions that the peer review comments apply to.

The versions of the paper that follow are the versions that were submitted during the peer review process. They are not the versions of record or the final published versions. They should not be cited or distributed as the published version of this manuscript.

BMJ Open is an open access journal and the full, final, typeset and author-corrected version of record of the manuscript is available on our site with no access controls, subscription charges or pay-per-view fees (<http://bmjopen.bmj.com>).

If you have any questions on BMJ Open's open peer review process please email [info.bmjopen@bmj.com](mailto:info.bmjopen@bmj.com)

# BMJ Open

## Reappraisal of previously reported meta-analyses on antibiotic prophylaxis in laparoscopic cholecystectomy. A systematic review.

|                                 |                                                                                                                                                                                                                                                                                                                                                                                          |
|---------------------------------|------------------------------------------------------------------------------------------------------------------------------------------------------------------------------------------------------------------------------------------------------------------------------------------------------------------------------------------------------------------------------------------|
| Journal:                        | <i>BMJ Open</i>                                                                                                                                                                                                                                                                                                                                                                          |
| Manuscript ID                   | bmjopen-2017-016666                                                                                                                                                                                                                                                                                                                                                                      |
| Article Type:                   | Research                                                                                                                                                                                                                                                                                                                                                                                 |
| Date Submitted by the Author:   | 02-Mar-2017                                                                                                                                                                                                                                                                                                                                                                              |
| Complete List of Authors:       | Matsui, Yoichi ; Kansai Medical University, Surgery<br>Satoi, Sohei; Kansai Medical University, Surgery<br>Hirooka, Satoshi; Kansai Medical University, Surgery<br>Yamaki, So; Kansai Medical University, Surgery<br>Kosaka, Hisashi; Kansai Medical University, Surgery<br>Yanagimoto, Hiroaki; Kansai Medical University, Surgery<br>Kon, Masanori; Kansai Medical University, Surgery |
| <b>Primary Subject Heading</b>: | Gastroenterology and hepatology                                                                                                                                                                                                                                                                                                                                                          |
| Secondary Subject Heading:      | Medical management, Surgery, Infectious diseases                                                                                                                                                                                                                                                                                                                                         |
| Keywords:                       | prophylactic antibiotics, laparoscopic cholecystectomy, randomized controlled trial, meta-analysis, surgical site infection., Hepatobiliary disease < GASTROENTEROLOGY, Infection control < INFECTIOUS DISEASES, Hepatobiliary surgery < SURGERY                                                                                                                                         |
|                                 |                                                                                                                                                                                                                                                                                                                                                                                          |

SCHOLARONE™  
Manuscripts

1  
2  
3  
4 **Reappraisal of previously reported meta-analyses on antibiotic**  
5 **prophylaxis in laparoscopic cholecystectomy. A systematic review**  
6  
7  
8  
9

10  
11 Yoichi Matsui, Sohei Satoi, Satoshi Hirooka, So Yamaki, Hisashi Kosaka, Hiroaki

12  
13 Yanagimoto, Masanori Kon

14  
15  
16  
17  
18 Department of Surgery, Kansai Medical University, Hirakata, Osaka, Japan  
19  
20  
21  
22

23 Correspondence to:

24 Yoichi Matsui,

25  
26  
27 Department of Surgery, Kansai Medical University,

28  
29 2-5-1, Shinmachi, Hirakata, Osaka 573-1010, Japan

30  
31 E-mail: [matsui@hirakata.kmu.ac.jp](mailto:matsui@hirakata.kmu.ac.jp).

32  
33  
34  
35 Tel: +8172-804-0101; Fax: +8172-804-2578  
36  
37  
38  
39

40 **Word count: 2073**  
41  
42  
43  
44  
45  
46  
47  
48  
49  
50  
51  
52  
53  
54  
55  
56  
57  
58  
59  
60

## ABSTRACT

**Objectives:** Many researchers have addressed overdosage and inappropriate antibiotic administration. To reduce unnecessary antibiotic use, many meta-analyses concerning antibiotic prophylaxis for low-risk laparoscopic cholecystectomy have been performed. All of these meta-analyses concluded that prophylactic antibiotics are not required for low-risk laparoscopic cholecystectomies. However, most trials in these meta-analyses had a small sample size and were considered as statistically underpowered for the rare event of postoperative infections in low-risk cholecystectomies. This study aimed to verify this conclusion by a systematic review of these meta-analyses.

**Methods:** A systematic review was undertaken. Searches were limited to meta-analyses and systematic reviews. Electronic databases were searched from inception until March 2016. The search was performed on PubMed and Cochrane Library databases using the following keyword combinations: “antibiotic prophylaxis”, “laparoscopic cholecystectomy”, “systematic review or meta-analysis”. Two independent reviewers selected meta-analyses or systematic reviews evaluating prophylactic antibiotics for laparoscopic cholecystectomy. All of the randomized controlled trials (RCTs) analyzed in these meta-analyses were also reviewed.

**Results:** Seven meta-analyses regarding prophylactic antibiotics for low-risk laparoscopic cholecystectomy that included a total of 28 RCTs were included. After reviewing these meta-analyses, 48 miscounts of the number of outcomes were found. Twenty-three of the 48 miscounts were disadvantageous and eight

1  
2  
3  
4 were advantageous regarding antibiotics, and the remaining 17 showed similar  
5  
6 results for antibiotics and controls. Six RCTs were inappropriate for the  
7  
8 meta-analyses. One trial targeted patients with acute cholecystitis. Another trial  
9  
10 measured insufficient outcomes. The original source of a third trial was not found.  
11  
12  
13 The study protocol of the remaining three was not appropriate for the  
14  
15 meta-analyses. After correcting the above miscounts and excluding the six  
16  
17 inappropriate RCTs, pooled risk ratios were recalculated. Subsequently, we  
18  
19 showed the different result that antibiotics significantly reduced the risk of  
20  
21 postoperative infections.  
22  
23  
24

25  
26 **Conclusions:** Prophylactic antibiotics are effective for elective laparoscopic  
27  
28 cholecystectomy to prevent postoperative infectious diseases.  
29  
30  
31

### 32 **Strengths and limitations of this study**

33  
34  
35

- 36 • This is the first study to systematically review and reappraise previously  
37 reported meta-analyses.
- 38 • Many randomized, controlled trials (RCTs) and meta-analyses concerning  
39 prophylactic antibiotic administration have been performed to reduce  
40 unnecessary antibiotic use. We reassessed all of these meta-analyses and  
41 their related RCTs, and found some issues. After correcting these issues and  
42 recalculating the pooled relative risks, we found different results from the  
43 original conclusions of these meta-analyses.  
44  
45  
46  
47  
48  
49  
50  
51  
52  
53  
54  
55  
56  
57  
58  
59  
60

- 1  
2  
3  
4  
5  
6  
7  
8  
9  
10  
11  
12  
13  
14  
15
- The RCTs that were included in these meta-analyses were performed in many countries, which have different life environments and a different health care system. Therefore, making definitive conclusions for the effects of antibiotic prophylaxis at this time is difficult.

16  
17

**Key words**

18 prophylactic antibiotics, laparoscopic cholecystectomy, randomized controlled  
19 trial, meta-analysis, surgical site infection.  
20  
21  
22  
23  
24  
25  
26  
27  
28  
29  
30  
31  
32  
33  
34  
35  
36  
37  
38  
39  
40  
41  
42  
43  
44  
45  
46  
47  
48  
49  
50  
51  
52  
53  
54  
55  
56  
57  
58  
59  
60

## INTRODUCTION

Many clinical researchers have addressed the issue of overdosage of antibiotics and inappropriate administration because antibiotic resistance is one of the biggest current threats to global health. Moreover, advanced nations face an increasing healthcare burden with a growing number of the aging population.

Under these situations, many randomized, controlled trials (RCTs) concerning prophylactic antibiotic administration for low-risk laparoscopic cholecystectomy have been performed to reduce unnecessary antibiotics use. Additionally, many meta-analyses,[1-7] were performed that analyzed a large number of RCTs,[8-35] and evaluated the role of prophylactic antibiotics for low-risk laparoscopic cholecystectomy. All of these meta-analyses showed no significant difference in the occurrence of postoperative infectious complications, including surgical site infections (SSIs), between the prophylactic antibiotics group and the non-prophylaxis group. Therefore, the conclusion was reached that prophylactic antibiotics are not required for low-risk laparoscopic cholecystectomy. However, most trials in these meta-analyses had a relatively small sample size and were considered as statistically underpowered for the rare event of postoperative infections in low-risk cholecystectomies. Meta-analyses that reviewed RCTs with a small sample size are problematic in that the true occurrence of postoperative infections might be underestimated,[36]. To reassess the results of these meta-analyses, we performed a systematic review of meta-analyses on antibiotic prophylaxis for low-risk laparoscopic cholecystectomy, and also reviewed all of their related RCTs.

## METHODS

To reappraise previous published meta-analyses or systematic reviews, searches were performed in PubMed and Cochrane Library databases in March 2016. We used the following keyword combinations: “antibiotic prophylaxis”, “laparoscopic cholecystectomy”, and “systematic review or meta-analysis”. The current systematic review for meta-analyses and systematic reviews was performed following the Preferred Reporting Items for Systematic reviews and Meta-analyses (PRISMA) guidelines,[37]. The literature search for the meta-analyses and systematic reviews was restricted to articles that were published in the English language. Additionally, all of the RCTs that were analyzed in these meta-analyses were collected and reviewed. The outcomes described in each meta-analysis were compared with the results shown in their original RCTs. Two investigators extracted and reviewed the data independently. Disagreements were resolved by interaction, discussion, and consensus.

The definition of prophylactic antibiotics for our review was antibiotics that were only provided preoperatively, or preoperatively and postoperatively, for prevention of postoperative infectious complications. A low risk of developing postoperative complications was defined as patients undergoing elective laparoscopic cholecystectomy for benign gallbladder diseases, but not for urgent surgery. Meta-analyses and systematic reviews for RCTs comparing antibiotic treatment *versus* placebo or no treatment in patients with a benign gallbladder disease undergoing laparoscopic cholecystectomy were included. Outcomes



1  
2  
3  
4 that were assessed were occurrence rates of SSI, distant infection, and overall  
5  
6  
7 infection.

8  
9  
10  
11 SSIs were defined as superficial or deep incisional infections or organ/space  
12  
13 infections according to the Guideline for Prevention of Surgical Site Infection,  
14  
15 1999,[38]. Distant infections were defined as infections occurring at sites other  
16  
17 than the surgical site. Overall infections were defined as the sum of SSIs and  
18  
19 distant infections. Some of the meta-analyses did not use the SSI classification  
20  
21 defined by the guidelines mentioned above. They classified “wound infections”  
22  
23 and “major infections” instead of the SSI classification. In these cases, we  
24  
25 rearranged the outcomes according to the SSI classification. Organ/space  
26  
27 infections that were included as “major infections” were treated as SSIs and  
28  
29 recalculated. Similarly, distant infections that were included as “major infections”  
30  
31 were treated as distant infections.  
32  
33  
34  
35  
36  
37  
38  
39

40 The following data regarding eligible meta-analyses were retrieved: eligibility  
41  
42 criteria, information sources, search methods, study selection, data collection  
43  
44 process, synthesis of results, number of RCTs included, total number of patients,  
45  
46 heterogeneity results, analysis methods used, pooled SSIs, pooled distant  
47  
48 infections, pooled overall infections, and conclusions. All of the literatures of  
49  
50 RCTs that were analyzed in each meta-analysis was then collected. The  
51  
52 following data were retrieved when reported: demographics, study design,  
53  
54 eligibility criteria, antibiotic treatment schedule, number of randomized patients,  
55  
56  
57  
58  
59  
60

1  
2  
3  
4 SSIs, distant infections, and overall infections. The outcomes demonstrated in  
5  
6 each meta-analysis were meticulously compared with all of their original RCTs.  
7  
8  
9

## 10 11 **Statistical analysis**

12  
13 Standard meta-analysis methods were applied according to the Cochrane  
14  
15 Handbook for Systematic Reviews of Interventions,[39] to evaluate the effect of  
16  
17 antibiotics on the occurrence of SSIs, distant infections, and overall infections.  
18  
19 Data were analyzed on an intention-to-treat basis. When this information was  
20  
21 not available, per-protocol data were used. Outcome measures were risk ratios  
22  
23 (RRs) with 95% confidence intervals (CIs), weighted by the inverse of their  
24  
25 variances. Antibiotic treatment was considered the experimental treatment, and  
26  
27 thus RRs are reported as antibiotic/no antibiotic ratios. Consistency of results  
28  
29 (effect sizes) among studies was assessed using two standard heterogeneity  
30  
31 tests, the chi square test-based Cochran Q test and the  $I^2$  statistic. Inconsistency  
32  
33 across studies was considered as low, moderate, and high for  $I^2$  values below  
34  
35 40%, between 30 and 60%, and greater than 50%, respectively, according to the  
36  
37 Cochrane Handbook,[39]. Heterogeneity was considered significant when the  $I^2$   
38  
39 value was greater than 50%, the Cochran Q test  $P$  value was less than 0.1, or  
40  
41 both. The fixed-effects model and the random-effects model were used to  
42  
43 calculate the overall effect. The fixed-effects model was calculated using the  
44  
45 Mantel–Haenszel method, and the random-effects model was calculated using  
46  
47 the DerSimonian–Laird method. R statistical software (Version 3.1.1) was used  
48  
49 for all of the calculations.  
50  
51  
52  
53  
54  
55  
56  
57  
58  
59  
60

## RESULTS

The search yielded 18 articles. After exclusions, seven meta-analyses,[1-7] in English regarding prophylactic antibiotics for low-risk laparoscopic cholecystectomy remained (Fig. 1). These meta-analyses were published between January 2003 and January 2016. Table 1 shows the sample sizes, outcomes, and conclusions of the meta-analyses. Of these seven meta-analyses, two studies,[1, 5] did not estimate overall infections. For analysis methods, the fixed-effects model was used in two studies,[4, 5], and the random-effects model in two studies,[2, 7]. The remaining three studies did not mention which model was applied for the final evaluation,[1, 3, 6]. No heterogeneity was found in any of the meta-analyses, except for the overall infections in the most recent meta-analysis,[7]. Of these seven meta-analyses, four studies,[1, 3, 4, 6] did not use the SSI classification. In these cases, the outcomes were rearranged according to the SSI classification as described in the Methods section.

**Table 1** Previous meta-analyses regarding prophylactic antibiotics for laparoscopic cholecystectomy.

| Published date<br>(No of RCTs<br>included) | Group                  | Analysis<br>model | Heterogeneity                                       | No. of postoperative infections (%) |                                |                                | OR (95%CI) of the<br>overall infections | Conclusions                                            |
|--------------------------------------------|------------------------|-------------------|-----------------------------------------------------|-------------------------------------|--------------------------------|--------------------------------|-----------------------------------------|--------------------------------------------------------|
|                                            |                        |                   |                                                     | SSIs                                | Distant<br>infections          | Overall<br>infections          |                                         |                                                        |
| 2003 <sup>1</sup> (5)                      | Antibiotics<br>Control | not<br>stated     | not significant                                     | 9/528 (1.7)<br>9/371 (2.4)          | 4/528 (0.8)<br>6/371 (1.6)     | —<br>—                         | —                                       | Do not support the use of<br>prophylactic antibiotics. |
| 2004 <sup>2</sup> (6)                      | Antibiotics<br>Control | Random<br>effects | not significant                                     | 12/567 (2.1)<br>12/407 (2.9)        | 4/567 (0.7)<br>6/407 (1.5)     | 16/567 (2.8)<br>18/407 (4.4)   | 0.69 (0.34 to 1.43)                     | No need to administer<br>routine antibiotics.          |
| 2008 <sup>3</sup> (9)                      | Antibiotics<br>Control | not<br>stated     | not significant                                     | 15/797 (1.9)<br>17/640 (2.7)        | 4/499 (0.8)<br>6/297 (2.0)     | 19/797 (2.4)<br>23/640 (3.6)   | 0.66 (0.35 to 1.24)                     | Antibiotics do not<br>prevent infections.              |
| 2009 <sup>4</sup> (15)                     | Antibiotics<br>Control | Fixed<br>effects  | not significant                                     | 25/1465 (1.7)<br>27/1443 (1.9)      | 6/613 (1.0)<br>9/452 (2.0)     | 31/1465 (2.1)<br>36/1443 (2.5) | 0.77 (0.47 to 1.27)                     | Antibiotics are<br>unnecessary.                        |
| 2010 <sup>5</sup> (11)                     | Antibiotics<br>Control | Fixed<br>effects  | not significant                                     | 24/900 (2.7)<br>25/764 (3.3)        | 7/657 (1.1)<br>10/531 (1.9)    | —<br>—                         | —                                       | No evidence to support<br>or refute antibiotics.       |
| 2011 <sup>6</sup> (12)                     | Antibiotics<br>Control | not<br>stated     | not significant                                     | 25/991 (2.5)<br>21/946 (2.2)        | 11/786 (1.4)<br>11/736 (1.5)   | 36/991 (3.6)<br>32/946 (3.4)   | 1.11 (0.68 to 1.82)                     | Antibiotics are not<br>necessary.                      |
| 2016 <sup>7</sup> (19)                     | Antibiotics<br>Control | Random<br>effects | not significant<br>except for<br>overall infections | 65/2709 (2.4)<br>82/2550 (3.2)      | 28/1488 (1.9)<br>51/1338 (3.8) | 62/1488 (4.2)<br>96/1338 (7.2) | 0.64 (0.36 to 1.14)                     | Antibiotics should not be<br>administered.             |

RCT, randomized controlled trial; SSI, surgical site infection; OR, odds ratio; CI, confidence interval; —, not estimated.

Superscript numbers indicate reference numbers.

1  
2  
3  
4 These seven meta-analyses included a total of 28 RCTs and 7065 patients, and  
5  
6 these RCTs were published between 1995 and 2014,[8-35]. The relationship  
7  
8 between the RCTs and the meta-analyses is shown in Fig. 2. Of these 28 RCTs,  
9  
10 one report of a trial was in Spanish [8] and eight were in Chinese,[14, 15, 17, 18,  
11  
12 20, 23, 24, 27]. All of the trials estimated SSIs, while 12 trials evaluated not only  
13  
14 SSIs, but also distant and overall postoperative infections,[9, 10, 13, 15, 21, 24,  
15  
16 26, 27, 29, 32-34]. After reviewing these meta-analyses and all of their related  
17  
18 RCTs, the following issues were found.  
19  
20  
21  
22

23  
24  
25 First, the number of postoperative infections, including SSIs, distant infections,  
26  
27 and overall infections, described in each meta-analysis were meticulously  
28  
29 compared with the original RCTs. Subsequently, we found a total of 48 simple  
30  
31 miscounts of the number of outcomes in six,[2-7] of seven meta-analyses related  
32  
33 to 15 RCTs,[9-11, 13, 16, 18-22, 25, 28, 29, 32, 34]. An example of this miscount  
34  
35 in outcome is that organ/space infections were not taken account as SSIs in one  
36  
37 RCT,[34] in a meta-analysis,[7]. Of these 48 miscounts, 23 were  
38  
39 disadvantageous and eight were advantageous regarding antibiotics. The  
40  
41 remaining 17 miscounts showed similar results for antibiotics and controls.  
42  
43  
44 Details of these miscounts and the relationship between the miscounts and the  
45  
46 meta-analyses or the RCTs are shown in supplementary appendix S1.  
47  
48  
49  
50  
51  
52

53  
54 Second, of the 28 RCTs, six trials were inappropriate for selection in the  
55  
56 meta-analyses,[18, 20, 23, 27, 28, 34]. One of the trials targeted patients with  
57  
58  
59  
60

1  
2  
3  
4 acute cholecystitis instead of low-risk cholecystectomies,[34]. Additionally, all of  
5  
6 the patients in both arms in this RCT were administered prophylactic antibiotics.  
7  
8 The authors estimated the efficacy of additional postoperative oral antibiotics  
9  
10 after prophylactic administration of antibiotics. They did not compare  
11  
12 prophylactic antibiotic treatment versus no antibiotic treatment. This RCT had a  
13  
14 different study aim and target compared with the other RCTs. A second trial had  
15  
16 insufficient endpoints,[28]. This trial did not estimate incisional infections and  
17  
18 only estimated organ/space infections. Therefore, this trial could not properly  
19  
20 estimate the occurrence of SSIs. In a third trial, its original source was not found,  
21  
22 even by an inquiry of the library of the authors' institution for information,[18].  
23  
24 The study protocol of the remaining three trials was different from the other  
25  
26 trials,[20, 23, 27]. One of their arms included only postoperative administration of  
27  
28 antibiotics. The study arms did not appear to be suitable for prophylaxis. These  
29  
30 six RCTs were thought to be inappropriate for these meta-analyses, and were  
31  
32 excluded from the current analysis.  
33  
34  
35  
36  
37  
38  
39  
40  
41

42 After correcting the above-mentioned miscounts and excluding the inappropriate  
43  
44 six trials, the pooled RRs and the 95% CIs were recalculated for a total of 5168  
45  
46 patients in 22 RCTs using the fixed-effects and random-effects models. We  
47  
48 found that the results were different from the conclusions of previous  
49  
50 meta-analyses (Table 2). When using the fixed-effects model, antibiotics  
51  
52 significantly reduced all of the risks of postoperative SSIs, distant infections, and  
53  
54 overall infections. The forest plot of SSI is shown in Fig. 3. A significant reduction  
55  
56  
57  
58  
59  
60

1  
2  
3  
4 in distant infections was found with the random-effects model. No heterogeneity  
5  
6 was found in SSIs, distant infections, and overall infections. Details of the results  
7  
8 of the current meta-analysis are shown in supplementary appendix S2.  
9  
10  
11  
12  
13  
14  
15  
16  
17  
18  
19  
20  
21  
22  
23  
24  
25  
26  
27  
28  
29  
30  
31  
32  
33  
34  
35  
36  
37  
38  
39  
40  
41  
42  
43  
44  
45  
46  
47  
48  
49  
50  
51  
52  
53  
54  
55  
56  
57  
58  
59  
60

**Table 2** Reappraisal results of pooled risk ratios of postoperative infections for low risk laparoscopic cholecystectomy.

| Postoperative infections | Total No of patients<br>(No of RCTs) | Fixed-effects model |              |        | Random-effects model |              |       |
|--------------------------|--------------------------------------|---------------------|--------------|--------|----------------------|--------------|-------|
|                          |                                      | RR                  | 95%CI        | P      | RR                   | 95%CI        | P     |
| Surgical site infections | 5168 (22)                            | 0.71                | 0.51 to 0.99 | 0.045  | 0.75                 | 0.53 to 1.07 | 0.117 |
| Distant infections       | 3170 (10)                            | 0.37                | 0.19 to 0.73 | 0.004  | 0.45                 | 0.22 to 0.92 | 0.028 |
| Overall infections       | 3170 (10)                            | 0.50                | 0.34 to 0.75 | 0.0006 | 0.63                 | 0.36 to 1.09 | 0.1   |

RCT, randomized controlled trial; RR, risk ratio; CI, confidence interval.



## DISCUSSION

Currently, administration of prophylactic antibiotics in patients undergoing cholecystectomy for the low-risk group is not recommended. This is because of the modest risk of developing an SSI and costs to the healthcare system. Additionally, there is a global campaign that aims to reduce inappropriate antibiotic administration to tackle the issue of emerging microbial resistance and increasing healthcare costs due to the era of an aging population. However, to date, there is little evidence regarding a reduction in medical costs and microbial resistance after eliminating antibiotic prophylaxis. Although omitting prophylactic antibiotics is thought to lower medical costs, only one RCT has shown medical costs of prophylactic antibiotic administration for low-risk cholecystectomies,[33]. This trial demonstrated that a reduction in cost was unexpectedly achieved by using prophylactic antibiotics, not by sparing antibiotics.

Generally, wide use of prophylactic antibiotics is thought to cause microbial resistance. However, evidence on this issue is not available. Microbial resistance might arise by a long duration of a large amount of therapeutic antibiotic administration rather than by a short course and small amount of prophylactic antibiotic use. When postoperative infection occurs, it requires therapeutic use of antibiotics, which may finally cause microbial resistance. If prophylactic antibiotics can prevent postoperative infections, prophylaxis may reduce microbial resistance by decreasing therapeutic antibiotic administration.

Because a prolonged period of antimicrobial therapy contributes to a higher

1  
2  
3  
4 prevalence of resistance, the optimal antibiotic choice for prophylaxis is required  
5  
6  
7 to prevent microbial resistance. There might be bias against “prophylactic”  
8  
9 antibiotics because of previous overdosage of “therapeutic” antibiotic agents that  
10  
11 have caused microbial resistance.  
12  
13  
14  
15

16 There are some problems of meta-analyses,[39]. When the results from a  
17  
18 meta-analysis have low heterogeneity, the fixed-effects model tends to be used  
19  
20 for analysis, while the random-effects model tends to be applied when relatively  
21  
22 higher heterogeneity is found. However, knowing in advance whether  
23  
24 heterogeneity is low or high is difficult for clinical researchers before beginning  
25  
26 the meta-analysis. Therefore, researchers can choose the random-effects model  
27  
28 or the fixed-effects model in accordance with their wishes after obtaining the  
29  
30 results of their meta-analysis. The random-effects model tends to show no  
31  
32 statistical difference between two groups, whereas the fixed-effects model tends  
33  
34 to show a statistical difference. If researchers wish to indicate no difference from  
35  
36 their meta-analysis, they would choose the random-effects model. However, if  
37  
38 they wish to indicate a difference, they would choose the fixed-effects model. In  
39  
40 these situations, the researchers’ bias can possibly affect the outcomes of the  
41  
42 meta-analysis.  
43  
44  
45  
46  
47  
48  
49  
50

51 The current reappraisal results showed no heterogeneity and the fixed-effects  
52  
53 model showed that prophylactic antibiotics significantly reduced the occurrence  
54  
55 of postoperative SSIs, distant infections, and overall infections. Moreover, even  
56  
57  
58  
59  
60

1  
2  
3  
4 when the random-effects model was used, distant infections were significantly  
5  
6 reduced by prophylaxis. Considering these results, we are unable to conclude  
7  
8 that prophylactic antibiotics are unnecessary.  
9  
10

11  
12  
13  
14 In conclusion, although all of the previous meta-analyses concluded that  
15  
16 prophylactic antibiotics were unnecessary, no definitive conclusions for the  
17  
18 effects of antibiotic prophylaxis on postoperative infections can be made at this  
19  
20 time. The effects of antibiotic prophylaxis on medical costs and microbial  
21  
22 resistance are also unclear at present. Large-scale, well-conducted RCTs, rather  
23  
24 than meta-analyses, regarding prophylactic antibiotics of which outcomes  
25  
26 include not only postoperative infections, but also microbial resistance and  
27  
28 medical costs, are required in the future. The outcomes of these RCTs should be  
29  
30 evaluated without bias.  
31  
32  
33  
34  
35  
36

37 **Contributors** All authors made a substantial contribution to this work. YM, SS,  
38  
39 SH and MK all contributed to the conception and design of the review and YM  
40  
41 drafted the paper. YM and SS read and screened all retained manuscripts  
42  
43 independently. YM, SH, SY and HY rated the quality of the papers. All authors  
44  
45 read and approved the final manuscript.  
46  
47  
48

49 **Funding** This research received no specific grant from any funding agency in  
50  
51 the public, commercial or not-for-profit sectors.  
52  
53

54 **Competing interests** None declared.  
55

56 **Data sharing statement** No additional data are available.  
57  
58  
59  
60

## REFERENCES

1. Al-Ghnaniem R, Benjamin IS, Patel AG. Meta-analysis suggests antibiotic prophylaxis is not warranted in low-risk patients undergoing laparoscopic cholecystectomy. *Brit J Surg* 2003;90:365-6.
2. Catarci M, Mancini S, Gentileschi P, et al. Antibiotic prophylaxis in elective laparoscopic cholecystectomy. Lack of need or lack of evidence? *Surg Endosc* 2004;18:638-41.
3. Choudhary A, Bechtold ML, Puli SR, et al. Role of prophylactic antibiotics in laparoscopic cholecystectomy: A meta-analysis. *J Gastrointest Surg* 2008;12:1847-53.
4. Zhou H, Zhang J, Wang Q, et al. Meta-analysis: antibiotic prophylaxis in elective laparoscopic cholecystectomy. *Aliment Pharmacol Ther* 2009;29:1086-95.
5. Sanabria A, Dominguez LC, Valdivieso E, et al. Antibiotic prophylaxis for patients undergoing elective laparoscopic cholecystectomy. *Cochrane Database of Systematic Reviews* 2010;12:1-35.
6. Yan RC, Shen SQ, Chen ZB, et al. The role of prophylactic antibiotics in laparoscopic cholecystectomy in preventing postoperative infection: A meta-analysis. *J Laparoendosc Adv Surg Tech* 2011;21:301-6.
7. Pasquali S, Boal M, Griffiths EA, et al. Meta-analysis of perioperative antibiotics in patients undergoing laparoscopic cholecystectomy. *Brit J Surg* 2016;103:27-34.
8. Csendes DA, Silva A, Burdiles P, et al. Profilaxis antibiótica en

- 1  
2  
3  
4           colecistectomía laparoscópica: estudio prospectivo randomizado. *Revista*  
5  
6  
7           *Chilena de Cirugia* 1995;47:145-7. (In Spanish)  
8  
9       9. Illig KA, Schmidt E, Cavanaugh J, et al. Are prophylactic antibiotics required  
10           for elective laparoscopic cholecystectomy? *J Am Coll Surg* 1997;184:353-6.  
11  
12  
13       10. Higgins A, London J, Charland S, et al. Prophylactic antibiotics for elective  
14           laparoscopic cholecystectomy. Are they necessary? *Arch Surg*  
15           1999;134:611-4.  
16  
17  
18       11. Dobay KJ, Freier DT, Albear P. The absent role of prophylactic antibiotics in  
19           low-risk patients undergoing laparoscopic cholecystectomy. *Am Surg*  
20           1999;65:226-8.  
21  
22  
23       12. Harling R, Moorjani N, Perry C, et al. A prospective, randomised trial of  
24           prophylactic antibiotics versus bag extraction in the prophylaxis of wound  
25           infection in laparoscopic cholecystectomy. *Ann R Coll Surg Engl*  
26           2000;82:408-10.  
27  
28  
29       13. Tocchi A, Lepre L, Costa G, et al. The need for antibiotic prophylaxis in  
30           elective laparoscopic cholecystectomy. *Arch Surg* 2000;135:67-70.  
31  
32  
33       14. Chen WJ, Mu YP, Li JD. Study on the prophylactic antibiotics in elective  
34           laparoscopic cholecystectomy. *Zhejiang Med J* 2000;22:684-5. (In Chinese)  
35  
36  
37       15. Shi HX, Zhang XD, Sun T. Evaluation of the use of antibiotic prophylaxis in  
38           elective laparoscopic cholecystectomy. *J Surg Conc Prac* 2001;6:403-4. (In  
39           Chinese)  
40  
41  
42       16. Mahatharadol V. A reevaluation of antibiotic prophylaxis in laparoscopic  
43           cholecystectomy: A randomized controlled trial. *J Med Assoc Thai*  
44  
45  
46  
47  
48  
49  
50  
51  
52  
53  
54  
55  
56  
57  
58  
59  
60

- 2001;84:105-8.
17. Wang LB, Chen WJ, Song XY. Antibiotic prophylaxis in elective laparoscopic cholecystectomy: a prospective trial. *Chinese J Nosocomio* 2002;12:845-6. (In Chinese)
18. He YD, Jin XD, Zhang XS. A prospective trial of preoperative antibiotic prophylaxis for prevention of postoperative infection in patients undergoing laparoscopic cholecystectomy. *Clinical Medicine* 2003;23:4-5. (In Chinese)
19. Koc M, Zulfikaroglu B, Kece C, et al. A prospective randomized study of prophylactic antibiotics in elective laparoscopic cholecystectomy. *Surg Endosc* 2003;17:1716-8.
20. Hu MQ, Chen BG, Song XJ. Preoperative antibiotic prophylaxis in elective laparoscopic cholecystectomy: a prospective trial. *Chinese Journal of General Surgery* 2004;19:639-40. (In Chinese)
21. Chang WT, Lee KT, Chuang SC, et al. The impact of prophylactic antibiotics on postoperative infection complication in elective laparoscopic cholecystectomy: a prospective randomized study. *Am J Surg* 2006;191:721-5.
22. Kuthe SA, Kaman L, Verma GR, et al. Evaluation of the role of prophylactic antibiotics in elective laparoscopic cholecystectomy: a prospective randomized trial. *Trop Gastroenterol* 2006;27:54-7.
23. Fang ZH, Hou YF, Wu W. The value of using antibiotic in perioperative period of laparoscopic cholecystectomy. *J Laparosc Surg* 2006;11:250-1. (In Chinese)

- 1  
2  
3  
4 24. Wang B, Shen LG, Li LB. Necessity of prophylactic antibiotics use in patients  
5  
6  
7     undergoing elective laparoscopic cholecystectomy. *Clin Educ Gen Prac*  
8  
9     2007;5:124-5. (In Chinese)  
10  
11 25. Yildiz B, Abbasoglu O, Tirnaksiz B, et al. Determinants of postoperative  
12  
13     infection after laparoscopic cholecystectomy. *Hepato-Gastroenterol*  
14  
15     2009;56:589-92.  
16  
17 26. Uludag M, Yetkin G, Citgez B. The role of prophylactic antibiotics in elective  
18  
19     laparoscopic cholecystectomy. *J Soc Laparoendosc Surg* 2009;13:337-41.  
20  
21 27. Yang XY. A prospective clinical study on gallbladder bile bacteria and  
22  
23     perioperative use of prophylactic antibiotics in elective laparoscopic  
24  
25     cholecystectomy. *Shanxi Medical University, Taiyuan* 2009;1-19. (In Chinese)  
26  
27  
28  
29 28. Gaur SLA, Pujahari GCAK. Role of prophylactic antibiotics in laparoscopic  
30  
31     cholecystectomy. *Med J Armed Forces India* 2010;66:228-30.  
32  
33  
34 29. Sharma N, Garg PK, Hadke NS, et al. Role of prophylactic antibiotics in  
35  
36     laparoscopic cholecystectomy and risk factors for surgical site infection: A  
37  
38     randomized controlled trial. *Surgical Infections* 2008;11:367-70.  
39  
40  
41 30. Shah JN, Maharjan SB, Paudyal S. Routine use of antibiotic prophylaxis in  
42  
43     low-risk laparoscopic cholecystectomy is unnecessary: A randomized clinical  
44  
45     trial. *Asian J Surg* 2012;35:136-9.  
46  
47  
48 31. Naqvi MA, Mehraj A, Ejaz R, et al. Role of prophylactic antibiotics in low risk  
49  
50     elective laparoscopic cholecystectomy: Is there a need? *J Ayub Med Coll*  
51  
52     *Abbottabad* 2013;25:172-4.  
53  
54  
55 32. Turk E, Karagulle E, Serefhanoglu K, et al. Effect of cefazolin prophylaxis on  
56  
57  
58  
59  
60

- 1  
2  
3  
4 postoperative infectious complications in elective laparoscopic  
5  
6  
7 cholecystectomy: A prospective randomized study. *Iran Red Cre Med J*  
8  
9 2013;15:581-6.  
10  
11 33. Matsui Y, Satoi S, Kaibori M, et al. Antibiotic prophylaxis in laparoscopic  
12  
13 cholecystectomy: A randomized controlled trial. *PLOS ONE* 2014;9:e106702.  
14  
15  
16 34. Regimbeau JM, Fuks D, Pautrat K, et al. Effect of postoperative antibiotics  
17  
18 administration on postoperative infection following cholecystectomy for acute  
19  
20 calculous cholecystitis. A randomized clinical trial. *JAMA* 2014;312:145-54.  
21  
22  
23 35. Ruangsri S, Laohawiriyakamol S, Sunpaweravong S, et al. The efficacy of  
24  
25 cefazolin in reducing surgical site infection in laparoscopic cholecystectomy:  
26  
27 a prospective randomized double-blind controlled trial. *Surg Endosc*  
28  
29 2014;29:874-81.  
30  
31  
32 36. Barie PS. Does well-done analysis of poor-quality data constitute evidence  
33  
34 of benefit? Editorial. *Ann Surg* 2012;255:1030-1.  
35  
36  
37 37. Liberati A, Altman DG, Tetzlaff J, et al. The PRISMA statement for reporting  
38  
39 systematic reviews and meta-analyses of studies that evaluate healthcare  
40  
41 interventions: explanation and elaboration. *BMJ* 2009;339:b2700.  
42  
43  
44 38. Mangram AJ, Horan TC, Pearson ML, et al. The Hospital Infection Control  
45  
46 Practices Advisory Committee. Guideline for Prevention of Surgical Site  
47  
48 Infection, 1999. *Infection Control and Hospital Epidemiology*  
49  
50 1999;20:250-78.  
51  
52  
53 39. Higgins JPT, Green S. Cochrane Handbook for Systematic Reviews of  
54  
55 Interventions Version 5.1.0 updated March 2011. The Cochrane  
56  
57  
58  
59  
60



1  
2  
3  
4  
5  
6  
7  
8  
9  
10  
11  
12  
13  
14  
15  
16  
17  
18  
19  
20  
21  
22  
23  
24  
25  
26  
27  
28  
29  
30  
31  
32  
33  
34  
35  
36  
37  
38  
39  
40  
41  
42  
43  
44  
45  
46  
47  
48  
49  
50  
51  
52  
53  
54  
55  
56  
57  
58  
59  
60

Collaboration: London, 2011 Available: <http://handbook.cochrane.org>

For peer review only

## Figure legends

**Fig. 1** Flow diagram of articles included in the systematic review.

**Fig. 2** Relationship between randomized controlled trials and meta-analyses.

**Fig. 3** Forest plot comparing surgical site infection in patients who underwent elective laparoscopic cholecystectomy with or without antibiotics. The fixed-effects model was calculated using the Mantel–Haenszel method for meta-analysis. Risk ratios are shown with 95% confidence intervals. Superscript numbers indicate reference numbers.

## Supplementary appendix

**S1** Meta-analyses and their related randomized controlled trials.

**S2** Reassessment of data from meta-analyses.

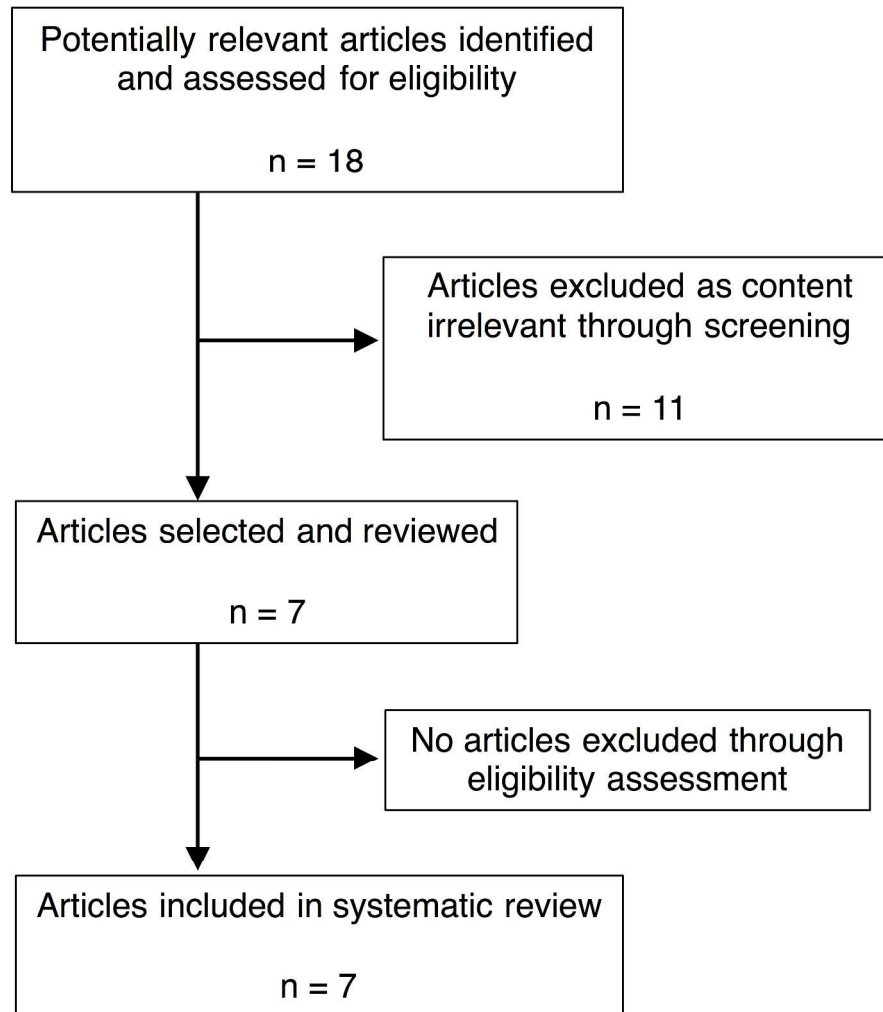

Fig. 1 Flow diagram of articles included in the systematic review.

1301x1420mm (72 x 72 DPI)

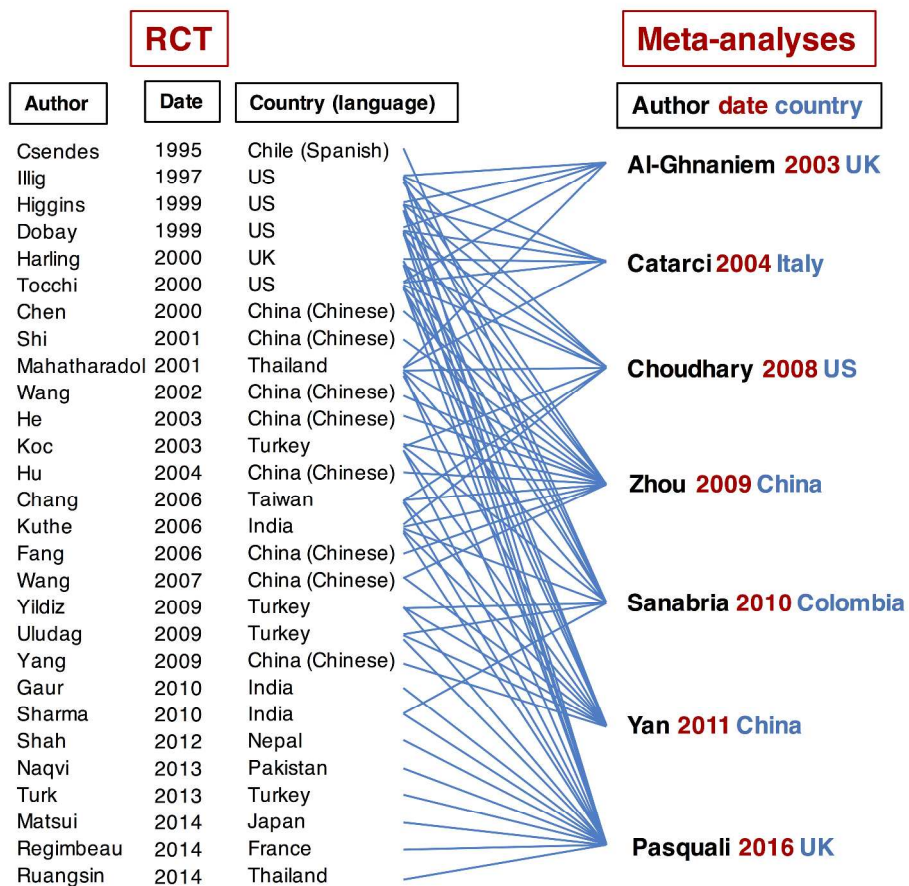

Fig. 2 Relationship between randomized controlled trials and meta-analyses.

1702x1605mm (72 x 72 DPI)

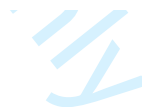

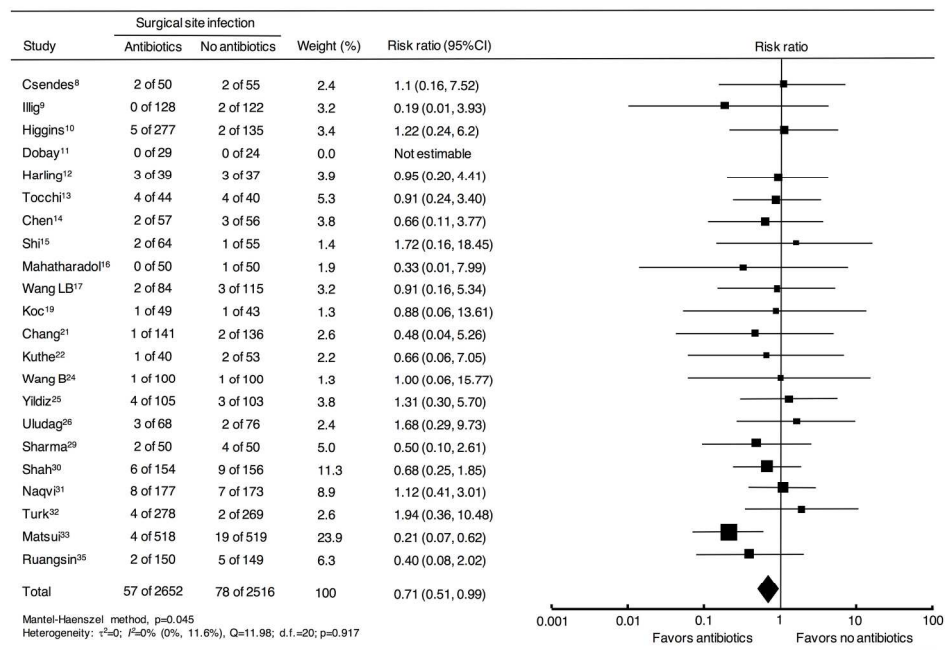

Fig. 3 Forest plot comparing surgical site infection in patients who underwent elective laparoscopic cholecystectomy with or without antibiotics. The fixed-effects model was calculated using the Mantel-Haenszel method for meta-analysis. Risk ratios are shown with 95% confidence intervals. Superscript numbers indicate reference numbers.

209x148mm (300 x 300 DPI)



## S2 Appendix Reassessment of data from meta-analyses.

| SSI each study |        |                   |           | SSI results |                            |        |                  |         |         |                   |
|----------------|--------|-------------------|-----------|-------------|----------------------------|--------|------------------|---------|---------|-------------------|
| Studies        | RR     | 95%CI             | %W(fixed) | %W(random)  | model                      | RR     | 95%CI            | z       | p-value | method            |
| Csendes        | 1.1000 | [0.1609; 7.5194]  | 2.4%      | 3.4%        | Fixed effect model         | 0.7095 | [0.5070; 0.9927] | -2.0024 | 0.0452  | Mantel-Haenszel   |
| Illig          | 0.1907 | [0.0092; 3.9314]  | 3.2%      | 1.4%        | Random effect model        | 0.7545 | [0.5304; 1.0733] | -1.5666 | 0.1172  | DerSimonian-Laird |
| Higgins        | 1.2184 | [0.2395; 6.1992]  | 3.4%      | 4.7%        |                            |        |                  |         |         |                   |
| Dobay          | NA     |                   | 0.0%      | 0.0%        | Quantifying heterogeneity: |        |                  |         |         |                   |
| Harling        | 0.9487 | [0.2042; 4.4068]  | 3.9%      | 5.3%        | $\tau^2 = 0; I^2 = 0\%$    |        |                  |         |         |                   |
| Tocchi         | 0.9091 | [0.2433; 3.3966]  | 5.3%      | 7.2%        |                            |        |                  |         |         |                   |
| Chen           | 0.6550 | [0.1137; 3.7720]  | 3.8%      | 4.1%        | Test of heterogeneity:     |        |                  |         |         |                   |
| Shi            | 1.7188 | [0.1601; 18.4460] | 1.4%      | 2.2%        | Q d.f. p-value             |        |                  |         |         |                   |
| Mahatharadol   | 0.3333 | [0.0139; 7.9896]  | 1.9%      | 1.2%        | 11.98 20 0.9167            |        |                  |         |         |                   |
| Wang LB        | 0.9127 | [0.1559; 5.3420]  | 3.2%      | 4.0%        |                            |        |                  |         |         |                   |
| Koc            | 0.8776 | [0.0566; 13.6094] | 1.3%      | 1.7%        |                            |        |                  |         |         |                   |
| Chang          | 0.4823 | [0.0442; 5.2573]  | 2.6%      | 2.2%        |                            |        |                  |         |         |                   |
| Kurthe         | 0.6625 | [0.0622; 7.0523]  | 2.2%      | 2.2%        |                            |        |                  |         |         |                   |
| Wang B         | 1.0000 | [0.0634; 15.7669] | 1.3%      | 1.6%        |                            |        |                  |         |         |                   |
| Yildiz         | 1.3079 | [0.3001; 5.7003]  | 3.8%      | 5.7%        |                            |        |                  |         |         |                   |
| Uludag         | 1.6765 | [0.2887; 9.7349]  | 2.4%      | 4.0%        |                            |        |                  |         |         |                   |
| Sharma         | 0.5000 | [0.0959; 2.6074]  | 5.0%      | 4.6%        |                            |        |                  |         |         |                   |
| Shah           | 0.6753 | [0.2463; 1.8518]  | 11.27     | 12.21       |                            |        |                  |         |         |                   |
| Naqvi          | 1.1170 | [0.4140; 3.0137]  | 8.92      | 12.61       |                            |        |                  |         |         |                   |
| Turk           | 1.9353 | [0.3574; 10.4784] | 2.56      | 4.35        |                            |        |                  |         |         |                   |
| Matsui         | 0.2109 | [0.0723; 0.6158]  | 23.92     | 10.82       |                            |        |                  |         |         |                   |
| Ruangsai       | 0.3973 | [0.0783; 2.0160]  | 6.32      | 4.71        |                            |        |                  |         |         |                   |

| Distant infections each study |        |                   |           | Distant infections results |                            |        |                  |         |         |                   |
|-------------------------------|--------|-------------------|-----------|----------------------------|----------------------------|--------|------------------|---------|---------|-------------------|
| Studies                       | RR     | 95%CI             | %W(fixed) | %W(random)                 | model                      | RR     | 95%CI            | z       | p-value | method            |
| Illig                         | 0.4766 | [0.0438; 5.1886]  | 6.7%      | 9.0%                       | Fixed effect model         | 0.3747 | [0.1914; 0.7333] | -2.8654 | 0.0042  | Mantel-Haenszel   |
| Higgins                       | 0.9747 | [0.0892; 10.6550] | 4.4%      | 9.0%                       | Random effect model        | 0.4475 | [0.2185; 0.9168] | -2.1974 | 0.0280  | DerSimonian-Laird |
| Tocchi                        | 0.3030 | [0.0328; 2.7965]  | 10.3%     | 10.4%                      |                            |        |                  |         |         |                   |
| Shi                           | 0.4297 | [0.0400; 4.6115]  | 7.1%      | 9.1%                       | Quantifying heterogeneity: |        |                  |         |         |                   |
| Chang                         | NA     |                   | 0.0%      | 0.0%                       | $\tau^2 = 0; I^2 = 0\%$    |        |                  |         |         |                   |
| Wang B                        | 1.0000 | [0.0634; 15.7669] | 3.3%      | 6.8%                       |                            |        |                  |         |         |                   |
| Uludag                        | 0.8941 | [0.2502; 3.1948]  | 15.5%     | 31.7%                      | Test of heterogeneity:     |        |                  |         |         |                   |
| Sharma                        | NA     |                   | 0.0%      | 0.0%                       | Q d.f. p-value             |        |                  |         |         |                   |
| Turk                          | NA     |                   | 0.0%      | 0.0%                       | 5.13 6 0.5274              |        |                  |         |         |                   |
| Matsui                        | 0.1252 | [0.0289; 0.5419]  | 52.6%     | 24.0%                      |                            |        |                  |         |         |                   |

| Overall infections each study |        |                   |           | Overall infections results |                                 |        |                  |         |         |                   |
|-------------------------------|--------|-------------------|-----------|----------------------------|---------------------------------|--------|------------------|---------|---------|-------------------|
| Studies                       | RR     | 95%CI             | %W(fixed) | %W(random)                 | model                           | RR     | 95%CI            | z       | p-value | method            |
| Illig                         | 0.2383 | [0.0270; 2.1021]  | 5.8%      | 5.4%                       | Fixed effect model              | 0.5034 | [0.3394; 0.7468] | -3.4114 | 0.0006  | Mantel-Haenszel   |
| Higgins                       | 1.1372 | [0.2987; 4.3289]  | 5.7%      | 11.0%                      | Random effect model             | 0.6257 | [0.3580; 1.0937] | -1.6455 | 0.0999  | DerSimonian-Laird |
| Tocchi                        | 0.6494 | [0.2239; 1.8832]  | 10.4%     | 14.3%                      |                                 |        |                  |         |         |                   |
| Shi                           | 0.8594 | [0.1807; 4.0853]  | 4.6%      | 9.0%                       | Quantifying heterogeneity:      |        |                  |         |         |                   |
| Chang                         | 0.4823 | [0.0442; 5.2573]  | 2.9%      | 4.6%                       | $\tau^2 = 0.2714; I^2 = 35.6\%$ |        |                  |         |         |                   |
| Wang B                        | 1.0000 | [0.1437; 6.9606]  | 2.8%      | 6.5%                       |                                 |        |                  |         |         |                   |
| Uludag                        | 1.1176 | [0.4131; 3.0237]  | 9.4%      | 15.3%                      | Test of heterogeneity:          |        |                  |         |         |                   |
| Sharma                        | 0.5000 | [0.0959; 2.6074]  | 5.7%      | 8.3%                       | Q d.f. p-value                  |        |                  |         |         |                   |
| Turk                          | 1.9353 | [0.3574; 10.4784] | 2.9%      | 8.0%                       | 13.98 9 0.1229                  |        |                  |         |         |                   |
| Matsui                        | 0.1718 | [0.0729; 0.4049]  | 49.7%     | 17.5%                      |                                 |        |                  |         |         |                   |

209x297mm (300 x 300 DPI)

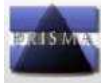

# PRISMA 2009 Checklist

| Section/topic                      | #  | Checklist item                                                                                                                                                                                                                                                                                              | Reported on page # |
|------------------------------------|----|-------------------------------------------------------------------------------------------------------------------------------------------------------------------------------------------------------------------------------------------------------------------------------------------------------------|--------------------|
| <b>TITLE</b>                       |    |                                                                                                                                                                                                                                                                                                             |                    |
| Title                              | 1  | Identify the report as a systematic review, meta-analysis, or both.                                                                                                                                                                                                                                         | 1                  |
| <b>ABSTRACT</b>                    |    |                                                                                                                                                                                                                                                                                                             |                    |
| Structured summary                 | 2  | Provide a structured summary including, as applicable: background; objectives; data sources; study eligibility criteria, participants, and interventions; study appraisal and synthesis methods; results; limitations; conclusions and implications of key findings; systematic review registration number. | 2,3                |
| <b>INTRODUCTION</b>                |    |                                                                                                                                                                                                                                                                                                             |                    |
| Rationale                          | 3  | Describe the rationale for the review in the context of what is already known.                                                                                                                                                                                                                              | 5                  |
| Objectives                         | 4  | Provide an explicit statement of questions being addressed with reference to participants, interventions, comparisons, outcomes, and study design (PICOS).                                                                                                                                                  | 5                  |
| <b>METHODS</b>                     |    |                                                                                                                                                                                                                                                                                                             |                    |
| Protocol and registration          | 5  | Indicate if a review protocol exists, if and where it can be accessed (e.g., Web address), and, if available, provide registration information including registration number.                                                                                                                               | -                  |
| Eligibility criteria               | 6  | Specify study characteristics (e.g., PICOS, length of follow-up) and report characteristics (e.g., years considered, language, publication status) used as criteria for eligibility, giving rationale.                                                                                                      | 6-8                |
| Information sources                | 7  | Describe all information sources (e.g., databases with dates of coverage, contact with study authors to identify additional studies) in the search and date last searched.                                                                                                                                  | 9-11               |
| Search                             | 8  | Present full electronic search strategy for at least one database, including any limits used, such that it could be repeated.                                                                                                                                                                               | 6                  |
| Study selection                    | 9  | State the process for selecting studies (i.e., screening, eligibility, included in systematic review, and, if applicable, included in the meta-analysis).                                                                                                                                                   | 6                  |
| Data collection process            | 10 | Describe method of data extraction from reports (e.g., piloted forms, independently, in duplicate) and any processes for obtaining and confirming data from investigators.                                                                                                                                  | 6                  |
| Data items                         | 11 | List and define all variables for which data were sought (e.g., PICOS, funding sources) and any assumptions and simplifications made.                                                                                                                                                                       | 6, 7               |
| Risk of bias in individual studies | 12 | Describe methods used for assessing risk of bias of individual studies (including specification of whether this was done at the study or outcome level), and how this information is to be used in any data synthesis.                                                                                      | -                  |
| Summary measures                   | 13 | State the principal summary measures (e.g., risk ratio, difference in means).                                                                                                                                                                                                                               | 8                  |
| Synthesis of results               | 14 | Describe the methods of handling data and combining results of studies, if done, including measures of consistency (e.g., $I^2$ ) for each meta-analysis.                                                                                                                                                   | 8                  |



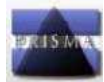

# PRISMA 2009 Checklist

Page 1 of 2

| Section/topic                 | #  | Checklist item                                                                                                                                                                                           | Reported on page # |
|-------------------------------|----|----------------------------------------------------------------------------------------------------------------------------------------------------------------------------------------------------------|--------------------|
| Risk of bias across studies   | 15 | Specify any assessment of risk of bias that may affect the cumulative evidence (e.g., publication bias, selective reporting within studies).                                                             | -                  |
| Additional analyses           | 16 | Describe methods of additional analyses (e.g., sensitivity or subgroup analyses, meta-regression), if done, indicating which were pre-specified.                                                         | -                  |
| <b>RESULTS</b>                |    |                                                                                                                                                                                                          |                    |
| Study selection               | 17 | Give numbers of studies screened, assessed for eligibility, and included in the review, with reasons for exclusions at each stage, ideally with a flow diagram.                                          | 9                  |
| Study characteristics         | 18 | For each study, present characteristics for which data were extracted (e.g., study size, PICOS, follow-up period) and provide the citations.                                                             | 9                  |
| Risk of bias within studies   | 19 | Present data on risk of bias of each study and, if available, any outcome level assessment (see item 12).                                                                                                | -                  |
| Results of individual studies | 20 | For all outcomes considered (benefits or harms), present, for each study: (a) simple summary data for each intervention group (b) effect estimates and confidence intervals, ideally with a forest plot. | 9-14               |
| Synthesis of results          | 21 | Present results of each meta-analysis done, including confidence intervals and measures of consistency.                                                                                                  | 10-14              |
| Risk of bias across studies   | 22 | Present results of any assessment of risk of bias across studies (see Item 15).                                                                                                                          | -                  |
| Additional analysis           | 23 | Give results of additional analyses, if done (e.g., sensitivity or subgroup analyses, meta-regression [see Item 16]).                                                                                    | -                  |
| <b>DISCUSSION</b>             |    |                                                                                                                                                                                                          |                    |
| Summary of evidence           | 24 | Summarize the main findings including the strength of evidence for each main outcome; consider their relevance to key groups (e.g., healthcare providers, users, and policy makers).                     | 15                 |
| Limitations                   | 25 | Discuss limitations at study and outcome level (e.g., risk of bias), and at review-level (e.g., incomplete retrieval of identified research, reporting bias).                                            | 17                 |
| Conclusions                   | 26 | Provide a general interpretation of the results in the context of other evidence, and implications for future research.                                                                                  | 17                 |
| <b>FUNDING</b>                |    |                                                                                                                                                                                                          |                    |
| Funding                       | 27 | Describe sources of funding for the systematic review and other support (e.g., supply of data); role of funders for the systematic review.                                                               | 17                 |

From: Moher D, Liberati A, Tetzlaff J, Altman DG, The PRISMA Group (2009). Preferred Reporting Items for Systematic Reviews and Meta-Analyses: The PRISMA Statement. PLoS Med 6(7): e1000097. doi:10.1371/journal.pmed1000097

For more information, visit: [www.prisma-statement.org](http://www.prisma-statement.org).

Page 2 of 2

For peer review only - <http://bmjopen.bmj.com/site/about/guidelines.xhtml>

# BMJ Open

## Reappraisal of previously reported meta-analyses on antibiotic prophylaxis for low-risk laparoscopic cholecystectomy: An overview of systematic reviews

|                                 |                                                                                                                                                                                                                                                                                                                                                 |
|---------------------------------|-------------------------------------------------------------------------------------------------------------------------------------------------------------------------------------------------------------------------------------------------------------------------------------------------------------------------------------------------|
| Journal:                        | <i>BMJ Open</i>                                                                                                                                                                                                                                                                                                                                 |
| Manuscript ID                   | bmjopen-2017-016666.R1                                                                                                                                                                                                                                                                                                                          |
| Article Type:                   | Research                                                                                                                                                                                                                                                                                                                                        |
| Date Submitted by the Author:   | 15-Nov-2017                                                                                                                                                                                                                                                                                                                                     |
| Complete List of Authors:       | Matsui, Yoichi ; Kansai Medical University, Surgery<br>Satoi, Sohei; Kansai Medical University, Surgery<br>Hirooka, Satoshi; Kansai Medical University, Surgery<br>Kosaka, Hisashi; Kansai Medical University, Surgery<br>Takayuki, Kawaura; Kansai Medical University, Mathematics<br>Tomoki, Kitawaki; Kansai Medical University, Mathematics |
| <b>Primary Subject Heading</b>: | Gastroenterology and hepatology                                                                                                                                                                                                                                                                                                                 |
| Secondary Subject Heading:      | Medical management, Surgery, Infectious diseases                                                                                                                                                                                                                                                                                                |
| Keywords:                       | laparoscopic cholecystectomy, meta-analysis, prophylactic antibiotics, randomized controlled trial, surgical site infection, systematic review                                                                                                                                                                                                  |
|                                 |                                                                                                                                                                                                                                                                                                                                                 |

SCHOLARONE™  
Manuscripts

Only

1  
2  
3  
4 **Reappraisal of previously reported meta-analyses on antibiotic**  
5 **prophylaxis for low-risk laparoscopic cholecystectomy: An overview of**  
6 **systematic reviews**  
7  
8  
9  
10

11  
12  
13 Yoichi Matsui<sup>1</sup>, Sohei Satoi<sup>1</sup>, Satoshi Hirooka<sup>1</sup>, Hisashi Kosaka<sup>1</sup>, Takayuki

14  
15  
16 Kawaura<sup>2</sup>, Tomoki Kitawaki<sup>2</sup>  
17

18  
19  
20  
21 <sup>1</sup>Department of Surgery, <sup>2</sup>Department of Mathematics, Kansai Medical University,  
22  
23 Hirakata, Osaka, Japan  
24  
25

26  
27  
28 Correspondence to:

29  
30 Yoichi Matsui,

31  
32 Department of Surgery, Kansai Medical University,

33  
34 2-5-1, Shinmachi, Hirakata, Osaka 573-1010, Japan  
35

36  
37 E-mail: [matsui@hirakata.kmu.ac.jp](mailto:matsui@hirakata.kmu.ac.jp).  
38

39  
40 Tel: +8172-804-0101; Fax: +8172-804-2578  
41  
42  
43

44 **Word count: 2615**  
45  
46  
47  
48  
49  
50  
51  
52  
53  
54  
55  
56  
57  
58  
59  
60

## ABSTRACT

**Introduction:** Many researchers have addressed over-dosage and inappropriate use of antibiotics. Many meta-analyses have investigated antibiotic prophylaxis for low-risk laparoscopic cholecystectomy with the aim of reducing unnecessary antibiotic use. Most of these meta-analyses have concluded that prophylactic antibiotics are not required for low-risk laparoscopic cholecystectomies. This study aimed to assess the validity of this conclusion by systematically reviewing these meta-analyses.

**Methods:** A systematic review was undertaken. Searches were limited to meta-analyses and systematic reviews. PubMed and Cochrane Library electronic databases were searched from inception until March 2016 using the following keyword combinations: “antibiotic prophylaxis”, “laparoscopic cholecystectomy”, and “systematic review or meta-analysis”. Two independent reviewers selected meta-analyses or systematic reviews evaluating prophylactic antibiotics for laparoscopic cholecystectomy. All of the randomized controlled trials (RCTs) analyzed in these meta-analyses were also reviewed.

**Results:** Seven meta-analyses regarding prophylactic antibiotics for low-risk laparoscopic cholecystectomy that had examined a total of 28 RCTs were included. Reviewing of these meta-analyses revealed 48 miscounts of the number of outcomes. Six RCTs were inappropriate for the meta-analyses; one targeted patients with acute cholecystitis, another measured inappropriate outcomes, the original source of a third was not found, and the study protocols of the remaining three were not appropriate for the meta-analyses. After correcting

1  
2  
3  
4 the above miscounts and excluding the six inappropriate RCTs, pooled risk  
5 ratios were recalculated. These showed that, contrary to what had previously  
6  
7 been concluded, antibiotics significantly reduced the risk of postoperative  
8  
9 infections. The rates of surgical site, distant, and overall infections were all  
10  
11 significantly reduced by antibiotic administration (risk ratio [95% confidence  
12  
13 interval]; 0.71 [0.51–0.99], 0.37 [0.19–0.73], 0.50 [0.34–0.75], respectively).  
14  
15  
16  
17

18 **Conclusions:** Prophylactic antibiotics reduce the incidence of postoperative  
19  
20 infections after elective laparoscopic cholecystectomy.  
21  
22

### 23 24 25 **Strengths and limitations of this study**

- 26  
27  
28 • This is the first study to systematically review and reappraise previously  
29  
30 reported meta-analyses.  
31  
32
- 33  
34 • Many randomized, controlled trials (RCTs) and meta-analyses concerning  
35  
36 prophylactic antibiotic administration have been performed to reduce  
37  
38 unnecessary antibiotic use. We reassessed all of these meta-analyses and  
39  
40 their related RCTs.  
41  
42
- 43  
44 • We found 48 miscounts of the number of outcomes as well as six RCTs that  
45  
46 were inappropriate for selection in the meta-analyses.  
47  
48
- 49  
50 • Because the RCTs that were included in these meta-analyses were performed  
51  
52 in many countries with different life environments and health care systems,  
53  
54 drawing definitive conclusions about the effects of antibiotic prophylaxis is  
55  
56 problematic.  
57  
58  
59  
60

**Key words**

laparoscopic cholecystectomy, meta-analysis, prophylactic antibiotics,  
randomized controlled trial, surgical site infection, systematic review

For peer review only

## INTRODUCTION

Many clinical researchers have addressed the issue of over-dosage of antibiotics and inappropriate administration because antibiotic resistance is one of the biggest current threats to global health. Moreover, developed nations are facing increasing medical costs associated with the aging of the population. Accordingly, many randomized controlled trials (RCTs) concerning prophylactic antibiotic administration for low-risk laparoscopic cholecystectomy have been performed with the aim of reducing unnecessary antibiotic use and thus minimizing antibiotic resistance and controlling increasing medical costs. Additionally, many meta-analyses [1-7] have analyzed a large number of RCTs [8-35] to evaluate the role of prophylactic antibiotics for low-risk laparoscopic cholecystectomy. All of these meta-analyses have found no significant difference in the rate of postoperative infectious complications, including surgical site infections (SSIs), between patients receiving versus not receiving prophylactic antibiotics. It has therefore been concluded that prophylactic antibiotics are not required for low-risk laparoscopic cholecystectomy. However, most trials in these meta-analyses had such small samples that they were considered statistically underpowered for the rare event of postoperative infections after low-risk cholecystectomies. Meta-analyses that reviewed small RCTs are problematic in that the true rates of postoperative infections may have been underestimated [36]. In addition, the most recently published meta-analysis regarding this clinical issue [37] reached a conclusion that was contrary to those of all of the previously published meta-analyses. We therefore performed a systematic review of

1  
2  
3  
4 meta-analyses on antibiotic prophylaxis for low-risk laparoscopic  
5  
6  
7 cholecystectomy to reassess the results of the previously published  
8  
9 meta-analyses that concluded no need for antibiotics and to review all of the  
10  
11 RCTs examined by them.  
12  
13  
14

## 15 **METHODS**

16  
17 To reappraise previously published meta-analyses or systematic reviews,  
18  
19 PubMed and Cochrane Library databases were searched in March 2016 using  
20  
21 the following keyword combinations: “antibiotic prophylaxis”, “laparoscopic  
22  
23 cholecystectomy”, and “systematic review or meta-analysis”. The current  
24  
25 systematic review for meta-analyses and systematic reviews was performed  
26  
27 following the Preferred Reporting Items for Systematic reviews and  
28  
29 Meta-Analyses (PRISMA) guidelines [38]. Only meta-analyses and systematic  
30  
31 reviews that were in English were searched. Additionally, all of the RCTs that  
32  
33 were analyzed in these meta-analyses were collected and reviewed and the  
34  
35 outcomes described in each meta-analysis compared with those reported in their  
36  
37 original RCTs. Two investigators extracted and reviewed the data independently.  
38  
39 Disagreements were resolved by interaction, discussion, and consensus.  
40  
41  
42  
43  
44  
45  
46  
47

48 For the present review, prophylactic antibiotics were defined as antibiotics that  
49  
50 were provided preoperatively, or preoperatively and postoperatively, for  
51  
52 preventing postoperative infectious complications. Patients at low risk of  
53  
54 developing postoperative complications were defined as those undergoing  
55  
56  
57  
58  
59  
60



1  
2  
3  
4 elective laparoscopic cholecystectomy for benign gallbladder diseases and did  
5  
6 not include those undergoing urgent surgery. Meta-analyses and systematic  
7  
8 reviews of RCTs comparing antibiotic treatment with placebo or no treatment in  
9  
10 patients with benign gallbladder diseases undergoing laparoscopic  
11  
12 cholecystectomy were included. The outcomes of rates of SSI, distant infection,  
13  
14 and overall infection were assessed.  
15  
16  
17  
18  
19  
20

21 SSIs were defined as superficial or deep incisional infections or organ/space  
22  
23 infections according to the Guideline for Prevention of Surgical Site Infection  
24  
25 1999 [39]. Distant infections were defined as infections occurring at sites other  
26  
27 than the surgical site. Overall infections were defined as the sum of SSIs and  
28  
29 distant infections. Some of the meta-analyses did not use the SSI classification  
30  
31 specified in this guidelines but classified infections as “wound infections” or  
32  
33 “major infections”. In the present study, these infections were reclassified  
34  
35 according to the SSI classification. Organ/space infections that had been  
36  
37 reported as “major infections” were treated as SSIs and recalculated. Similarly,  
38  
39 distant infections that were reported as “major infections” were treated as distant  
40  
41 infections.  
42  
43  
44  
45  
46  
47  
48

49 The following data regarding eligible meta-analyses were retrieved: eligibility  
50  
51 criteria, information sources, search methods, study selection, data collection  
52  
53 process, synthesis of results, number of RCTs examined, total number of  
54  
55 patients, heterogeneity results, analysis methods used, pooled SSIs, pooled  
56  
57  
58  
59  
60

1  
2  
3  
4 distant infections, pooled overall infections, and conclusions. All of the original  
5 reports of RCTs that were analyzed in each meta-analysis were then collected  
6 and the following data retrieved from then when reported: patient characteristics,  
7 study design, eligibility criteria, antibiotic treatment schedule, number of  
8 randomized patients, SSIs, distant infections, and overall infections. The  
9 outcomes used in each meta-analysis were meticulously compared with those  
10 reported for their original RCTs.  
11  
12  
13  
14  
15  
16  
17  
18  
19  
20  
21  
22

### 23 **Statistical analysis**

24  
25 Standard meta-analysis methods were applied according to the Cochrane  
26 Handbook for Systematic Reviews of Interventions [40] to evaluate the effect of  
27 antibiotics on the incidence of SSIs, distant infections, and overall infections.  
28 Data were analyzed on an intention-to-treat basis. When this information was  
29 not available, per-protocol data were used. Outcome measures were risk ratios  
30 (RRs) with 95% confidence intervals (CIs) weighted by the inverse of their  
31 variances. Antibiotic treatment was considered the experimental treatment; thus  
32 RRs are reported as antibiotic/no antibiotic ratios. Consistency of results (effect  
33 sizes) among studies was assessed using two standard heterogeneity tests, the  
34  $\chi^2$  test-based Cochran Q test and the  $I^2$  statistic. Inconsistency across studies  
35 was considered as low, moderate and high for  $I^2$  values below 40%, between  
36 30% and 60%, and greater than 50%, respectively, according to the Cochrane  
37 Handbook [39]. Heterogeneity was considered significant when the  $I^2$  value was  
38 greater than 50%, the Cochran Q test  $P$  value was less than 0.1, or both.  
39  
40  
41  
42  
43  
44  
45  
46  
47  
48  
49  
50  
51  
52  
53  
54  
55  
56  
57  
58  
59  
60

1  
2  
3  
4 Fixed-effects and random-effects models were used to calculate the overall  
5  
6  
7 effect. The fixed-effects model was calculated using the Mantel–Haenszel  
8  
9 method and the random-effects model using the DerSimonian–Laird method. R  
10  
11 statistical software (Version 3.1.1) was used for all calculations.  
12  
13  
14

## 15 **RESULTS**

16  
17 The search yielded 18 articles of which 11 were excluded for following reasons;  
18  
19 eight had irrelevant contents, two were not in English, and the remaining one  
20  
21 was not a meta-analysis or systematic review. Whereas there were no  
22  
23 discrepancies between the two observers regarding decisions to include/exclude  
24  
25 each meta-analysis, there were two discrepancies regarding decisions to  
26  
27 include/exclude each RCT. The reasons for these discrepancies were as follows;  
28  
29  
30 One observer had overlooked an inappropriate study design for Reference 23  
31  
32 and inappropriate outcome measures for Reference 28. These discrepancies  
33  
34 were resolved by discussion between the two observers. Results of the full  
35  
36 search strategy and Kappa statistics are shown in Supplementary Appendixes  
37  
38 S1 and S2, respectively.  
39  
40  
41  
42  
43  
44  
45

46 After exclusions, seven meta-analyses [1-7] in English regarding prophylactic  
47  
48 antibiotics for low-risk laparoscopic cholecystectomy remained (Fig. 1), all of  
49  
50 which were published between January 2003 and January 2016. Table 1 shows  
51  
52 the sample sizes, outcomes and conclusions of these meta-analyses. Two [1, 5]  
53  
54 of these seven meta-analyses did not calculate overall incidence of infections.  
55  
56  
57  
58  
59  
60

1  
2  
3  
4 As to analysis methods, the fixed-effects model was used in two studies [4, 5]  
5  
6 and the random-effects model in two studies [2, 7]. The remaining three studies  
7  
8 did not mention which model was used for the final evaluation [1, 3, 6]. No  
9  
10 heterogeneity was found in any of the meta-analyses except for overall rate of  
11  
12 infection in the most recent meta-analysis [7]. Four [1, 3, 4, 6] of these seven  
13  
14 meta-analyses did not use the SSI classification. As described in the Methods  
15  
16 section, the outcomes in these studies were reclassified according to the SSI  
17  
18 classification for the present study.  
19  
20  
21  
22  
23  
24  
25  
26  
27  
28  
29  
30  
31  
32  
33  
34  
35  
36  
37  
38  
39  
40  
41  
42  
43  
44  
45  
46  
47  
48  
49  
50  
51  
52  
53  
54  
55  
56  
57  
58  
59  
60

**Table 1.** Previous meta-analyses regarding prophylactic antibiotics for laparoscopic cholecystectomy.

| Published date<br>(No of RCTs<br>included) | Group                  | Analysis<br>model | Heterogeneity                                       | No. of postoperative infections (%) |                                |                                | OR (95%CI) of the<br>overall infections | Conclusions                                            |
|--------------------------------------------|------------------------|-------------------|-----------------------------------------------------|-------------------------------------|--------------------------------|--------------------------------|-----------------------------------------|--------------------------------------------------------|
|                                            |                        |                   |                                                     | SSIs                                | Distant<br>infections          | Overall<br>infections          |                                         |                                                        |
| 2003 <sup>1</sup> (5)                      | Antibiotics<br>Control | not<br>stated     | not significant                                     | 9/528 (1.7)<br>9/371 (2.4)          | 4/528 (0.8)<br>6/371 (1.6)     | —<br>—                         | —                                       | Do not support the use of<br>prophylactic antibiotics. |
| 2004 <sup>2</sup> (6)                      | Antibiotics<br>Control | Random<br>effects | not significant                                     | 12/567 (2.1)<br>12/407 (2.9)        | 4/567 (0.7)<br>6/407 (1.5)     | 16/567 (2.8)<br>18/407 (4.4)   | 0.69 (0.34 to 1.43)                     | No need to administer<br>routine antibiotics.          |
| 2008 <sup>3</sup> (9)                      | Antibiotics<br>Control | not<br>stated     | not significant                                     | 15/797 (1.9)<br>17/640 (2.7)        | 4/499 (0.8)<br>6/297 (2.0)     | 19/797 (2.4)<br>23/640 (3.6)   | 0.66 (0.35 to 1.24)                     | Antibiotics do not<br>prevent infections.              |
| 2009 <sup>4</sup> (15)                     | Antibiotics<br>Control | Fixed<br>effects  | not significant                                     | 25/1465 (1.7)<br>27/1443 (1.9)      | 6/613 (1.0)<br>9/452 (2.0)     | 31/1465 (2.1)<br>36/1443 (2.5) | 0.77 (0.47 to 1.27)                     | Antibiotics are<br>unnecessary.                        |
| 2010 <sup>5</sup> (11)                     | Antibiotics<br>Control | Fixed<br>effects  | not significant                                     | 24/900 (2.7)<br>25/764 (3.3)        | 7/657 (1.1)<br>10/531 (1.9)    | —<br>—                         | —                                       | No evidence to support<br>or refute antibiotics.       |
| 2011 <sup>6</sup> (12)                     | Antibiotics<br>Control | not<br>stated     | not significant                                     | 25/991 (2.5)<br>21/946 (2.2)        | 11/786 (1.4)<br>11/736 (1.5)   | 36/991 (3.6)<br>32/946 (3.4)   | 1.11 (0.68 to 1.82)                     | Antibiotics are not<br>necessary.                      |
| 2016 <sup>7</sup> (19)                     | Antibiotics<br>Control | Random<br>effects | not significant<br>except for<br>overall infections | 65/2709 (2.4)<br>82/2550 (3.2)      | 28/1488 (1.9)<br>51/1338 (3.8) | 62/1488 (4.2)<br>96/1338 (7.2) | 0.64 (0.36 to 1.14)                     | Antibiotics should not be<br>administered.             |

RCT, randomized controlled trial; SSI, surgical site infection; OR, odds ratio; CI, confidence interval; —, not estimated.

Superscript numbers indicate reference numbers.

1  
2  
3  
4 These seven meta-analyses included a total of 28 RCTs and 7065 patients;  
5  
6 these RCTs were published between 1995 and 2014 [8-35]. The relationships  
7  
8 between the RCTs and meta-analyses are shown in Fig. 2. Of these 28 RCTs,  
9  
10 one was reported in Spanish [8] and eight in Chinese [14, 15, 17, 18, 20, 23, 24,  
11  
12 27]. All of these trials estimated SSIs and 12 of them also evaluated distant and  
13  
14 overall postoperative infections [9, 10, 13, 15, 21, 24, 26, 27, 29, 32-34]. Review  
15  
16 of these meta-analyses and all of their related RCTs revealed the following  
17  
18 issues.  
19  
20  
21  
22  
23  
24

25  
26 First, the number of postoperative infections, including SSIs, distant infections  
27  
28 and overall infections, reported in each meta-analysis were meticulously  
29  
30 compared with those cited in the original RCTs. This comparison revealed 48  
31  
32 simple miscounts of the number of outcomes in six [2-7] of seven meta-analyses  
33  
34 that had examined 15 RCTs [9-11, 13, 16, 18-22, 25, 28, 29, 32, 34]. An example  
35  
36 of such a miscount in outcome is that organ/space infections were not included  
37  
38 as SSIs in one RCT [34] in a meta-analysis [7]. Of these 48 miscounts, 23 were  
39  
40 disadvantageous and eight were advantageous regarding antibiotics. The  
41  
42 remaining 17 miscounts showed similar results for antibiotics and controls.  
43  
44  
45

46  
47 Details of these miscounts and the relationships between them and the  
48  
49 meta-analyses or RCTs are shown in supplementary appendix S3.  
50  
51  
52

53  
54 Second, six of the 28 RCTs were inappropriate for inclusion in the meta-analyses  
55  
56 [18, 20, 23, 27, 28, 34]. One of these six trials targeted patients with acute  
57  
58  
59  
60

1  
2  
3  
4  
5  
6  
7  
8  
9  
10  
11  
12  
13  
14  
15  
16  
17  
18  
19  
20  
21  
22  
23  
24  
25  
26  
27  
28  
29  
30  
31  
32  
33  
34  
35  
36  
37  
38  
39  
40  
41  
42  
43  
44  
45  
46  
47  
48  
49  
50  
51  
52  
53  
54  
55  
56  
57  
58  
59  
60

cholecystitis rather than low-risk cholecystectomies [34]. Additionally, all of the patients in both arms in this RCT had received prophylactic antibiotics. The authors had investigated the efficacy of additional postoperative oral antibiotics after prophylactic administration of antibiotics rather than comparing prophylactic antibiotic treatment with no antibiotic treatment. This RCT had a different study aim and target than the other RCTs. A second trial had insufficient endpoints [28], having failed to include incisional infections but examined only organ/space infections. The incidence of SSIs could therefore not be accurately extracted from this report. The original source of a third trial was not found, even after requesting information from the library of the authors' institution [18]. The study protocols of the remaining three trials were different from those of the other trials [20, 23, 27]. One of their arms was only postoperative administration of antibiotics; thus, the study arms did not appear to be suitable for prophylaxis. These six RCTs were considered inappropriate for these meta-analyses, which were therefore excluded from the current analysis.

After correcting the above-mentioned miscounts and excluding the six inaccurate trials, the pooled RRs and 95% CIs were recalculated for a total of 5168 patients in 22 RCTs using fixed-effects and random-effects models, yielding results that differed from the conclusions of the original previous meta-analyses (Table 2). According to the fixed-effects model, antibiotics significantly reduced the risks of all three categories of postoperative infection: SSIs, distant infections, and overall infections. A forest plot of for SSI is shown in

1  
2  
3  
4 Fig. 3. A significant reduction in distant infections was found with the  
5  
6 random-effects model. No heterogeneity was found in SSIs, distant infections, or  
7  
8 overall infections. Details of the results of the current meta-analysis are shown in  
9  
10 supplementary appendix S4.  
11  
12  
13  
14  
15

16 A funnel plot of the available studies is presented in Fig. 4. Egger's test yielded a  
17  
18 p-value of 0.745, indicating there was likely no publication bias. However, the plot  
19  
20 did not scatter completely symmetrically, particularly in the lower-right aspect,  
21  
22 possibly indicating that small studies reporting negative results have not been  
23  
24 published. Results of meta-regression analyses showed no significant  
25  
26 differences regarding publication year, publication language, and event rates of  
27  
28 antibiotic (SA ratio) and control groups (SC ratio) (supplementary appendix S5).  
29  
30 Sensitivity and trial-sequential analyses were not performed because the results  
31  
32 of meta-regression analyses indicated no statistical differences in these  
33  
34 analyses. Additionally, no correlation analyses were performed because several  
35  
36 of the RCTs included had not reported conflicts of interest or funding sources.  
37  
38  
39  
40  
41  
42  
43  
44  
45  
46  
47  
48  
49  
50  
51  
52  
53  
54  
55  
56  
57  
58  
59  
60



**Table 2.** Results of reappraisal of pooled risk ratios for postoperative infections after low risk laparoscopic cholecystectomy.

| Postoperative infections | Total No of patients<br>(No of RCTs) | Fixed-effects model |              |        | Random-effects model |              |       |
|--------------------------|--------------------------------------|---------------------|--------------|--------|----------------------|--------------|-------|
|                          |                                      | RR                  | 95%CI        | P      | RR                   | 95%CI        | P     |
| Surgical site infections | 5168 (22)                            | 0.71                | 0.51 to 0.99 | 0.045  | 0.75                 | 0.53 to 1.07 | 0.117 |
| Distant infections       | 3170 (10)                            | 0.37                | 0.19 to 0.73 | 0.004  | 0.45                 | 0.22 to 0.92 | 0.028 |
| Overall infections       | 3170 (10)                            | 0.50                | 0.34 to 0.75 | 0.0006 | 0.63                 | 0.36 to 1.09 | 0.1   |

RCT, randomized controlled trial; RR, risk ratio; CI, confidence interval.

## DISCUSSION

Currently, administration of prophylactic antibiotics to patients undergoing low-risk cholecystectomy is not recommended because of the modest risk of developing an SSI and healthcare costs. Additionally, there is a global campaign to reduce inappropriate antibiotic administration with the aims of minimizing further development of microbial resistance and the increasing healthcare costs associated with aging of the population. However, to date, there is little evidence regarding reducing medical costs and microbial resistance by eliminating antibiotic prophylaxis. Although omitting prophylactic antibiotics is thought to lower medical costs, only one RCT has reported the medical costs of prophylactic antibiotic administration for low-risk cholecystectomies [33]. This trial unexpectedly demonstrated that reduction in cost was associated with using prophylactic antibiotics rather than withholding them.

Widespread use of prophylactic antibiotics is generally thought to cause microbial resistance. However, there is little evidence to support this. Microbial resistance may be caused by administering large amounts of therapeutic antibiotic for long periods rather than by short courses of small amounts of prophylactic antibiotics. When postoperative infection does occur, it requires therapeutic use of antibiotics, which may result in microbial resistance. If prophylactic antibiotics can prevent postoperative infections, prophylaxis may reduce microbial resistance by reducing administration of antibiotics therapeutically. Because prolonged antimicrobial therapy is associated with a

1  
2  
3  
4 higher prevalence of resistance, optimal prophylactic antibiotics are required to  
5 prevent microbial resistance. Some of the bias against “prophylactic” antibiotics  
6 may be attributable to previous over-dosage of “therapeutic” antibiotic agents  
7 having resulted in microbial resistance.  
8  
9  
10  
11  
12

13  
14  
15  
16 There are two possible reasons for our results being contrary to those of past  
17 meta-analyses. The first is the correction of 48 miscounts of the number of  
18 events in 15 RCTs to strictly accord with the definition of SSIs. The second  
19 reason is the exclusion of six inappropriate RCTs. The exclusion of one [34] of  
20 these six trials may have greatly influenced the reversal of previous findings  
21 because it was relatively large trial and the greatest number of miscounts of this  
22 trial were found in the most recent meta-analysis [7] by the current review.  
23  
24  
25  
26  
27  
28  
29  
30  
31  
32  
33  
34

35 The fixed-effects model is most appropriate when results of a meta-analysis  
36 have low heterogeneity, whereas the random-effects model is indicated when  
37 there is relatively high heterogeneity [40]. The results of the current reappraisal  
38 showed no heterogeneity and the fixed-effects model showed that prophylactic  
39 antibiotics significantly reduce the incidence of postoperative SSIs, distant  
40 infections, and overall infections. Moreover, even when the random-effects  
41 model was used, the incidence of distant infections was found to have been  
42 significantly reduced by prophylaxis. Considering these results, we cannot  
43  
44  
45  
46  
47  
48  
49  
50  
51  
52  
53  
54 validly conclude that prophylactic antibiotics are unnecessary.  
55  
56  
57  
58  
59  
60

1  
2  
3  
4 Most of the previous meta-analyses concluded prophylactic antibiotics were  
5 unnecessary because there was no significant difference between the two arms.  
6  
7 However, the absence of a statistically significant difference does not validly lead  
8  
9 to the conclusion that antibiotics are unnecessary, the only valid conclusion is  
10  
11 that there is insufficient evidence to support or refute the efficacy of prophylactic  
12  
13 antibiotics. Nevertheless, six of seven meta-analyses rejected prophylactic  
14  
15 antibiotics, which in turn introduced a bias into the meta-analyses. Rather than  
16  
17 meta-analyses, a large-scale, well-conducted RCT regarding the effect of  
18  
19 prophylactic antibiotics on incidence of postoperative infections is needed to  
20  
21 reach a definitive conclusion. Such an RCT would require a sample size of  
22  
23 around 4500 cases with alfa error of 0.5 and power of 0.8, based on an  
24  
25 incidence of SSIs of 2.1% (57/2652) in the Antibiotics group versus 3.1%  
26  
27 (78/2516), in the Control group, as determined by the current study.  
28  
29  
30  
31  
32  
33  
34  
35  
36

37 One limitation of this study is such 'super-analysis of analyses' is also open to  
38  
39 bias and error because, even in a 'super-analysis', it is impossible to completely  
40  
41 remove all bias inherent in the assessed meta-analyses and in their original  
42  
43 RCTs. We tried our best to avoid measurement bias by integrating the criteria of  
44  
45 the events and precisely recounting the number of events in the meta-analyses  
46  
47 and all of the RCTs. In addition, the RCTs that were included in these  
48  
49 meta-analyses were performed in many countries with their differing life  
50  
51 environments and health care systems. Therefore, drawing definitive  
52  
53 conclusions about the effects of antibiotic prophylaxis is problematic.  
54  
55  
56  
57  
58  
59  
60

1  
2  
3  
4  
5  
6  
7 In conclusion, although all the previous meta-analyses except for the most  
8 recent one [37] concluded that prophylactic antibiotics are unnecessary, no  
9 definitive conclusions concerning the effects of antibiotic prophylaxis on  
10 postoperative infections can validly be drawn as yet. The effects of antibiotic  
11 prophylaxis on medical costs and microbial resistance also remain unclear.  
12  
13 Large-scale RCTs regarding prophylactic antibiotics that address the outcomes  
14 of microbial resistance and medical costs as well as postoperative infections are  
15 required in the future. All possible sources of bias should be eliminated in these  
16 RCTs.  
17  
18  
19  
20  
21  
22  
23  
24  
25  
26  
27  
28  
29

### 30 **Acknowledgements**

31  
32 We would like to express our sincere appreciation to secretaries Ayaka Fujimoto  
33 and Kumi Sakamoto of the Department of Surgery, Kansai Medical University.  
34

35 We also thank Dr Trish Reynolds, MBBS, FRACP, from Edanz Group  
36 ([www.edanzediting.com/ac](http://www.edanzediting.com/ac)) for editing a draft of this manuscript.  
37  
38  
39  
40  
41  
42  
43

44 **Author contributions** All authors made substantial contributions to this work.  
45  
46 YM, SS, SH and HK all contributed to the conception and design of the review  
47 and YM drafted the paper. YM and SS read and screened all retained  
48 manuscripts independently. YM, SH, TK and TK rated the quality of the papers.  
49  
50 All authors read and approved the final manuscript.  
51  
52  
53  
54  
55  
56  
57  
58  
59  
60

1  
2  
3  
4 **Funding** This research received no specific grant from any funding agency in  
5  
6 the public, commercial or not-for-profit sectors.  
7  
8

9  
10  
11 **Competing interests** None declared.  
12  
13

14  
15  
16 **Data sharing statement** No additional data are available.  
17  
18  
19  
20  
21  
22  
23  
24  
25  
26  
27  
28  
29  
30  
31  
32  
33  
34  
35  
36  
37  
38  
39  
40  
41  
42  
43  
44  
45  
46  
47  
48  
49  
50  
51  
52  
53  
54  
55  
56  
57  
58  
59  
60

**REFERENCES**

1. Al-Ghnaniem R, Benjamin IS, Patel AG. Meta-analysis suggests antibiotic prophylaxis is not warranted in low-risk patients undergoing laparoscopic cholecystectomy. *Brit J Surg* 2003;90:365-6.
2. Catarci M, Mancini S, Gentileschi P, et al. Antibiotic prophylaxis in elective laparoscopic cholecystectomy. Lack of need or lack of evidence? *Surg Endosc* 2004;18:638-41.
3. Choudhary A, Bechtold ML, Puli SR, et al. Role of prophylactic antibiotics in laparoscopic cholecystectomy: A meta-analysis. *J Gastrointest Surg* 2008;12:1847-53.
4. Zhou H, Zhang J, Wang Q, et al. Meta-analysis: antibiotic prophylaxis in elective laparoscopic cholecystectomy. *Aliment Pharmacol Ther* 2009;29:1086-95.
5. Sanabria A, Dominguez LC, Valdivieso E, et al. Antibiotic prophylaxis for patients undergoing elective laparoscopic cholecystectomy. *Cochrane Database of Systematic Reviews* 2010;12:1-35.
6. Yan RC, Shen SQ, Chen ZB, et al. The role of prophylactic antibiotics in laparoscopic cholecystectomy in preventing postoperative infection: A meta-analysis. *J Laparoendosc Adv Surg Tech* 2011;21:301-6.
7. Pasquali S, Boal M, Griffiths EA, et al. Meta-analysis of perioperative antibiotics in patients undergoing laparoscopic cholecystectomy. *Brit J Surg* 2016;103:27-34.
8. Csendes DA, Silva A, Burdiles P, et al. Profilaxis antibiótica en

- 1  
2  
3  
4           colecistectomía laparoscópica: estudio prospectivo randomizado. *Revista*  
5  
6  
7           *Chilena de Cirugía* 1995;47:145-7. (In Spanish)  
8  
9       9. Illig KA, Schmidt E, Cavanaugh J, et al. Are prophylactic antibiotics required  
10           for elective laparoscopic cholecystectomy? *J Am Coll Surg* 1997;184:353-6.  
11  
12  
13       10. Higgins A, London J, Charland S, et al. Prophylactic antibiotics for elective  
14           laparoscopic cholecystectomy. Are they necessary? *Arch Surg*  
15           1999;134:611-4.  
16  
17  
18       11. Dobay KJ, Freier DT, Albear P. The absent role of prophylactic antibiotics in  
19           low-risk patients undergoing laparoscopic cholecystectomy. *Am Surg*  
20           1999;65:226-8.  
21  
22  
23       12. Harling R, Moorjani N, Perry C, et al. A prospective, randomised trial of  
24           prophylactic antibiotics versus bag extraction in the prophylaxis of wound  
25           infection in laparoscopic cholecystectomy. *Ann R Coll Surg Engl*  
26           2000;82:408-10.  
27  
28       13. Tocchi A, Lepre L, Costa G, et al. The need for antibiotic prophylaxis in  
29           elective laparoscopic cholecystectomy. *Arch Surg* 2000;135:67-70.  
30  
31  
32       14. Chen WJ, Mu YP, Li JD. Study on the prophylactic antibiotics in elective  
33           laparoscopic cholecystectomy. *Zhejiang Med J* 2000;22:684-5. (In Chinese)  
34  
35  
36       15. Shi HX, Zhang XD, Sun T. Evaluation of the use of antibiotic prophylaxis in  
37           elective laparoscopic cholecystectomy. *J Surg Conc Prac* 2001;6:403-4. (In  
38           Chinese)  
39  
40  
41  
42       16. Mahatharadol V. A reevaluation of antibiotic prophylaxis in laparoscopic  
43           cholecystectomy: A randomized controlled trial. *J Med Assoc Thai*  
44  
45  
46  
47  
48  
49  
50  
51  
52  
53  
54  
55  
56  
57  
58  
59  
60



- 1  
2  
3  
4 2001;84:105-8.  
5  
6  
7 17. Wang LB, Chen WJ, Song XY. Antibiotic prophylaxis in elective laparoscopic  
8  
9 cholecystectomy: a prospective trial. *Chinese J Nosocomio* 2002;12:845-6.  
10  
11 (In Chinese)  
12  
13  
14 18. He YD, Jin XD, Zhang XS. A prospective trial of preoperative antibiotic  
15  
16 prophylaxis for prevention of postoperative infection in patients undergoing  
17  
18 laparoscopic cholecystectomy. *Clinical Medicine* 2003;23:4-5. (In Chinese)  
19  
20  
21 19. Koc M, Zulfikaroglu B, Kece C, et al. A prospective randomized study of  
22  
23 prophylactic antibiotics in elective laparoscopic cholecystectomy. *Surg*  
24  
25 *Endosc* 2003;17:1716-8.  
26  
27  
28 20. Hu MQ, Chen BG, Song XJ. Preoperative antibiotic prophylaxis in elective  
29  
30 laparoscopic cholecystectomy: a prospective trial. *Chinese Journal of*  
31  
32 *General Surgery* 2004;19:639-40. (In Chinese)  
33  
34  
35 21. Chang WT, Lee KT, Chuang SC, et al. The impact of prophylactic antibiotics  
36  
37 on postoperative infection complication in elective laparoscopic  
38  
39 cholecystectomy: a prospective randomized study. *Am J Surg*  
40  
41 2006;191:721-5.  
42  
43  
44 22. Kuthe SA, Kaman L, Verma GR, et al. Evaluation of the role of prophylactic  
45  
46 antibiotics in elective laparoscopic cholecystectomy: a prospective  
47  
48 randomized trial. *Trop Gastroenterol* 2006;27:54-7.  
49  
50  
51 23. Fang ZH, Hou YF, Wu W. The value of using antibiotic in perioperative period  
52  
53 of laparoscopic cholecystectomy. *J Laparoscop Surg* 2006;11:250-1. (In  
54  
55 Chinese)  
56  
57  
58  
59  
60

- 1  
2  
3  
4  
5  
6  
7  
8  
9  
10  
11  
12  
13  
14  
15  
16  
17  
18  
19  
20  
21  
22  
23  
24  
25  
26  
27  
28  
29  
30  
31  
32  
33  
34  
35  
36  
37  
38  
39  
40  
41  
42  
43  
44  
45  
46  
47  
48  
49  
50  
51  
52  
53  
54  
55  
56  
57  
58  
59  
60
24. Wang B, Shen LG, Li LB. Necessity of prophylactic antibiotics use in patients undergoing elective laparoscopic cholecystectomy. *Clin Educ Gen Prac* 2007;5:124-5. (In Chinese)
25. Yildiz B, Abbasoglu O, Tirnaksiz B, et al. Determinants of postoperative infection after laparoscopic cholecystectomy. *Hepato-Gastroenterol* 2009;56:589-92.
26. Uludag M, Yetkin G, Citgez B. The role of prophylactic antibiotics in elective laparoscopic cholecystectomy. *J Soc Laparoendosc Surg* 2009;13:337-41.
27. Yang XY. A prospective clinical study on gallbladder bile bacteria and perioperative use of prophylactic antibiotics in elective laparoscopic cholecystectomy. *Shanxi Medical University, Taiyuan* 2009;1-19. (In Chinese)
28. Gaur SLA, Pujahari GCAK. Role of prophylactic antibiotics in laparoscopic cholecystectomy. *Med J Armed Forces India* 2010;66:228-30.
29. Sharma N, Garg PK, Hadke NS, et al. Role of prophylactic antibiotics in laparoscopic cholecystectomy and risk factors for surgical site infection: A randomized controlled trial. *Surgical Infections* 2008;11:367-70.
30. Shah JN, Maharjan SB, Paudyal S. Routine use of antibiotic prophylaxis in low-risk laparoscopic cholecystectomy is unnecessary: A randomized clinical trial. *Asian J Surg* 2012;35:136-9.
31. Naqvi MA, Mehraj A, Ejaz R, et al. Role of prophylactic antibiotics in low risk elective laparoscopic cholecystectomy: Is there a need? *J Ayub Med Coll Abbottabad* 2013;25:172-4.
32. Turk E, Karagulle E, Serefhanoglu K, et al. Effect of cefazolin prophylaxis on

- 1  
2  
3  
4 postoperative infectious complications in elective laparoscopic  
5 cholecystectomy: A prospective randomized study. *Iran Red Cre Med J*  
6  
7 2013;15:581-6.  
8  
9  
10  
11 33. Matsui Y, Satoi S, Kaibori M, et al. Antibiotic prophylaxis in laparoscopic  
12 cholecystectomy: A randomized controlled trial. *PLOS ONE* 2014;9:e106702.  
13  
14  
15  
16 34. Regimbeau JM, Fuks D, Pautrat K, et al. Effect of postoperative antibiotics  
17 administration on postoperative infection following cholecystectomy for acute  
18 calculous cholecystitis. A randomized clinical trial. *JAMA* 2014;312:145-54.  
19  
20  
21  
22  
23 35. Ruangsri S, Laohawiriyakamol S, Sunpaweravong S, et al. The efficacy of  
24 cefazolin in reducing surgical site infection in laparoscopic cholecystectomy:  
25 a prospective randomized double-blind controlled trial. *Surg Endosc*  
26  
27 2014;29:874-81.  
28  
29  
30  
31  
32  
33 36. Barie PS. Does well-done analysis of poor-quality data constitute evidence  
34 of benefit? Editorial. *Ann Surg* 2012;255:1030-1.  
35  
36  
37  
38 37. Liang B, Dai M, Zou Z. Safety and efficacy of antibiotic prophylaxis in  
39 patients undergoing elective laparoscopic cholecystectomy: A systematic  
40 review and meta-analysis. *J Gastroenterol Hepatol* 2016;31:921-8.  
41  
42  
43  
44 38. Liberati A, Altman DG, Tetzlaff J, et al. The PRISMA statement for reporting  
45 systematic reviews and meta-analyses of studies that evaluate healthcare  
46 interventions: explanation and elaboration. *BMJ* 2009;339:b2700.  
47  
48  
49  
50  
51 39. Mangram AJ, Horan TC, Pearson ML, et al. The Hospital Infection Control  
52 Practices Advisory Committee. Guideline for Prevention of Surgical Site  
53 Infection, 1999. *Infection Control and Hospital Epidemiology*  
54  
55  
56  
57  
58  
59

1  
2  
3  
4  
5  
6  
7  
8  
9  
10  
11  
12  
13  
14  
15  
16  
17  
18  
19  
20  
21  
22  
23  
24  
25  
26  
27  
28  
29  
30  
31  
32  
33  
34  
35  
36  
37  
38  
39  
40  
41  
42  
43  
44  
45  
46  
47  
48  
49  
50  
51  
52  
53  
54  
55  
56  
57  
58  
59  
60

1999;20:250-78.

40. Higgins JPT, Green S. Cochrane Handbook for Systematic Reviews of Interventions Version 5.1.0 updated March 2011. The Cochrane Collaboration: London, 2011 Available: <http://handbook.cochrane.org>

For peer review only

## Figure legends

**Fig. 1.** Flow diagram of articles included in the systematic review.

**Fig. 2.** Relationships between randomized controlled trials and meta-analyses.

**Fig. 3.** Forest plot comparing surgical site infection in patients who underwent elective laparoscopic cholecystectomy with or without antibiotics. The fixed-effects model was calculated using the Mantel–Haenszel method for meta-analysis. Risk ratios are shown with 95% confidence intervals. Superscript numbers indicate reference numbers.

**Fig. 4.** Funnel plot for determination of publication bias.

## Supplementary appendix

**S1** Results of full search strategy

**S2** Kappa statistics

**S3** Meta-analyses and their related randomized controlled trials

**S4** Reassessment of data from meta-analyses

**S5** Results of meta-regression analyses

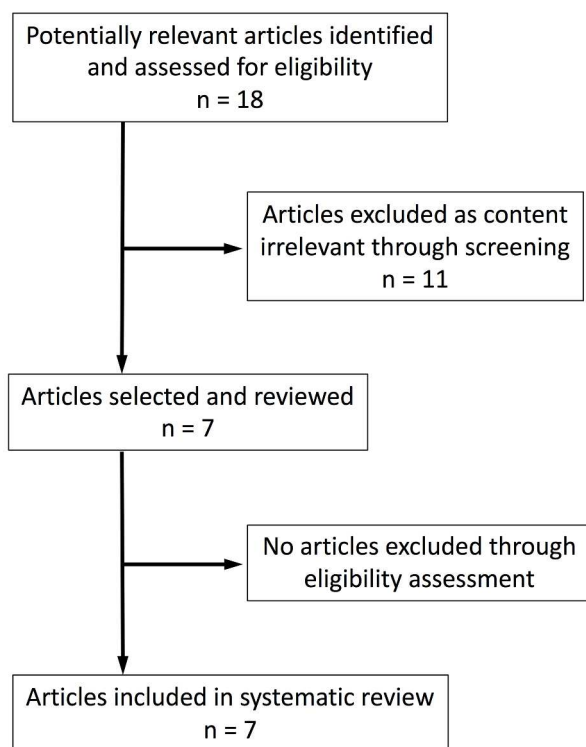

45  
46  
47  
48  
49  
50  
51  
52  
53  
54  
55  
56  
57  
58  
59  
60

Fig. 1. Flow diagram of articles included in the systematic review.

296x420mm (300 x 300 DPI)

1  
2  
3  
4  
5  
6  
7  
8  
9  
10  
11  
12  
13  
14  
15  
16  
17  
18  
19  
20  
21  
22  
23  
24  
25  
26  
27  
28  
29  
30  
31  
32  
33  
34  
35  
36  
37  
38  
39  
40  
41  
42  
43  
44  
45  
46  
47  
48  
49  
50  
51  
52  
53  
54  
55  
56  
57  
58  
59  
60

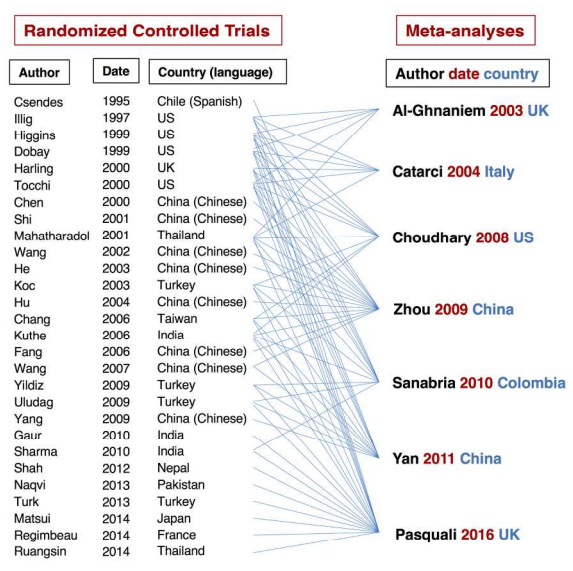

Fig. 2. Relationships between randomized controlled trials and meta-analyses.

209x148mm (300 x 300 DPI)

new only

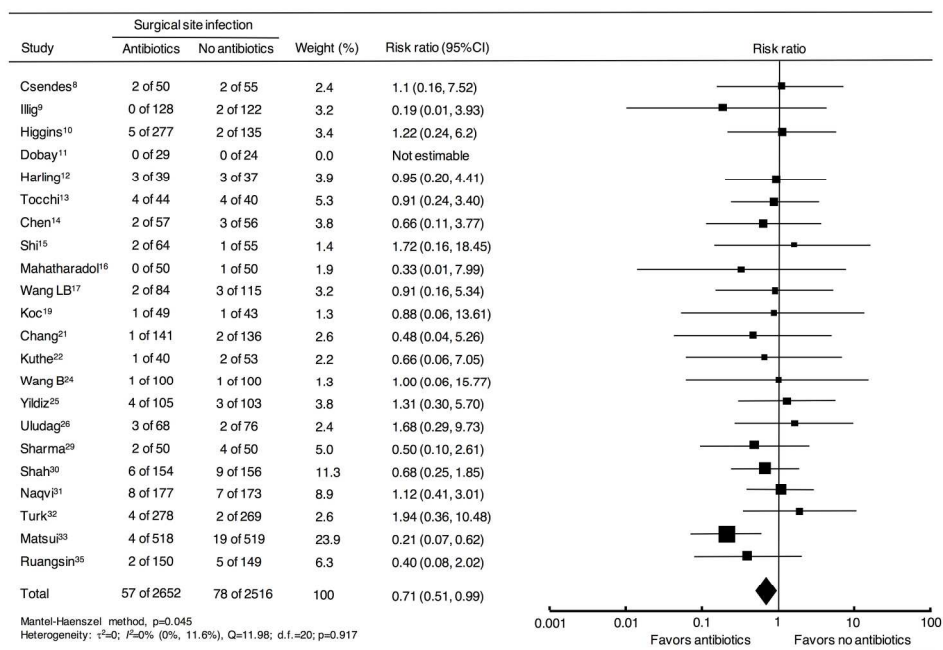

Fig. 3. Forest plot comparing surgical site infection in patients who underwent elective laparoscopic cholecystectomy with or without antibiotics. The fixed-effects model was calculated using the Mantel-Haenszel method for meta-analysis. Risk ratios are shown with 95% confidence intervals. Superscript numbers indicate reference numbers.

209x148mm (300 x 300 DPI)



1  
2  
3  
4  
5  
6  
7  
8  
9  
10  
11  
12  
13  
14  
15  
16  
17  
18  
19  
20  
21  
22  
23  
24  
25  
26  
27  
28  
29  
30  
31  
32  
33  
34  
35  
36  
37  
38  
39  
40  
41  
42  
43  
44  
45  
46  
47  
48  
49  
50  
51  
52  
53  
54  
55  
56  
57  
58  
59  
60

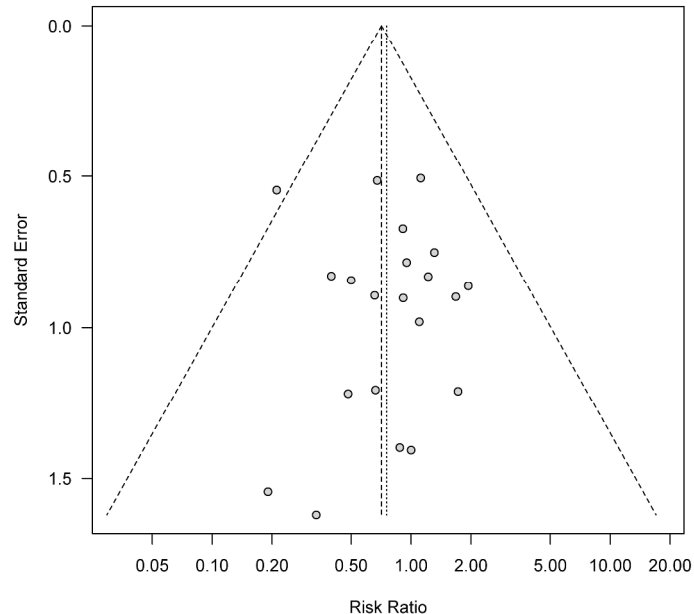

Fig. 4. Funnel plot for determination of publication bias.

297x420mm (300 x 300 DPI)

## Results of full search strategy

PubMed and Cochrane Library databases were searched in March 2016 using the following keyword combinations: “antibiotic prophylaxis”, “laparoscopic cholecystectomy”, and “systematic review or meta-analysis”. This search yielded the 18 articles listed below.

1. Anthuber M, Schremppf M. Meta-analysis for perioperative antibiotics during laparoscopic cholecystectomy. *Chirurgy* 2016;87:251.
2. Pasquali S, Boal M, Griffiths EA, et al. Meta-analysis of perioperative antibiotics in patients undergoing laparoscopic cholecystectomy. *Brit J Surg* 2016;103:27–34.
3. Cochrane Upper GI and Pancreatic Diseases Group. Early routine endoscopic retrograde cholangiopancreatography strategy versus early conservative management strategy in acute gallstone pancreatitis. *Cochrane Database Syst Rev* 2012;DOI:10.1002/14651858.CD009779.pub2.
4. Yan RC, Shen SQ, Chen ZB, et al. The role of prophylactic antibiotics in laparoscopic cholecystectomy in preventing postoperative infection: a meta-analysis. *J Laparoendosc Adv Surg Tech A* 2011;21:301–6.
5. Sanabria A, Dominguez LC, Valdivieso E, et al. Antibiotic prophylaxis for patients undergoing elective laparoscopic cholecystectomy. *Cochrane Database Syst Rev* 2010;12:1–35.
6. Zhou H, Zhang J, Wang Q, et al. Meta-analysis: antibiotic prophylaxis in elective laparoscopic cholecystectomy. *Aliment Pharmacol Ther* 2009;29:1086–95.
7. Choudhary A, Bechtold ML, Puli SR, et al. Role of prophylactic antibiotics in laparoscopic cholecystectomy: A meta-analysis. *J Gastrointest Surg* 2008;12:1847–53.
8. Gurusamy KS, Samraj K. Cholecystectomy for patients with silent gallstones. *Cochrane Database Syst Rev* 2007;DOI:10.1002/14651858.CD006230.pub2.
9. Alexakis N, Neoptolemos JP. Algorithm for the diagnosis and treatment of acute biliary pancreatitis. *Scand J Surg* 2005;94:124–9.

- 1  
2  
3  
4  
5 10. Goldfaden A, Birkmeyer JD. Evidence-based practice in laparoscopic  
6 surgery: perioperative care. *Surg Innov* 2005;12:51–61.  
7  
8 11. Catarci M, Mancini S, Gentileschi P, et al. Antibiotic prophylaxis in elective  
9 laparoscopic cholecystectomy. Lack of need or lack of evidence? *Surg*  
10 *Endosc* 2004;18:638–41.  
11  
12 12. Al-Ghnaniem R, Benjamin IS, Patel AG. Meta-analysis suggests antibiotic  
13 prophylaxis is not warranted in low-risk patients undergoing laparoscopic  
14 cholecystectomy. *Brit J Surg* 2003;90:365–6.  
15  
16 13. Shah SK, Mutignani M, Costamagna G. Therapeutic biliary endoscopy.  
17 *Endoscopy* 2002;34:43053.  
18  
19 14. Colizza S, Rossi S. Antibiotic prophylaxis and treatment of surgical  
20 abdominal sepsis. *J Chemother* 2001;13:193–201.  
21  
22 15. Mandato M, Ruggiero R, Corsale I, et al. Septic complications of gallbladder  
23 lacerations during laparoscopic cholecystectomy. *G Chir* 2001;22:277–80.  
24  
25 16. Raraty MG, Pope IM, Finch M, et al. Choledocholithiasis and gallstone  
26 pancreatitis. *Baillieres Clin Gastroenterol* 1997;11:663–80.  
27  
28 17. Gondret R, Vaillard ML, Huguier M. Antibiotic prophylaxis in biliary surgery.  
29 *Ann Chir* 1995;49:493–9.  
30  
31 18. Gouma DJ, Obertop H. Acute calculous cholecystitis. What is new in  
32 diagnosis and therapy? *HPB Surg* 1992;6:69–78.  
33  
34  
35  
36  
37

38 The 11 articles in blue font (1, 3, 8–10, 13–18) were excluded after screening  
39 because of inappropriate content.  
40  
41

## 42 **Reasons for exclusion**

43 **Article 1:** Not in English

44 **Articles 3, 8–10, 13:** Irrelevant content

45 **Article 14:** Not a meta-analysis or systematic review

46 **Articles 15, 16:** Irrelevant content

47 **Article 17:** Not in English

48 **Article 18:** Irrelevant content  
49  
50  
51  
52  
53  
54  
55  
56  
57  
58  
59  
60

1  
2  
3  
4  
5  
6  
7  
8  
9  
10  
11  
12  
13  
14  
15  
16  
17  
18  
19  
20  
21  
22  
23  
24  
25  
26  
27  
28  
29  
30  
31  
32  
33  
34  
35  
36  
37  
38  
39  
40  
41  
42  
43  
44  
45  
46  
47  
48  
49  
50  
51  
52  
53  
54  
55  
56  
57  
58  
59  
60

| Meta-analyses | Observer 1 | Observer 2 |
|---------------|------------|------------|
| First author  |            |            |
| 1 Anthuber    | exclude    | exclude    |
| 2 Pasquali    | include    | include    |
| 3 Cochrane    | exclude    | exclude    |
| 4 Yan         | include    | include    |
| 5 Sanabria    | include    | include    |
| 6 Zhou        | include    | include    |
| 7 Choudhary   | include    | include    |
| 8 Gurusamy    | exclude    | exclude    |
| 9 Alexakis    | exclude    | exclude    |
| 10 Goldfaden  | exclude    | exclude    |
| 11 Catarci    | include    | include    |
| 12 Al-Ghnam   | include    | include    |
| 13 Shah       | exclude    | exclude    |
| 14 Colizza    | exclude    | exclude    |
| 15 Mandato    | exclude    | exclude    |
| 16 Raraty     | exclude    | exclude    |
| 17 Gondret    | exclude    | exclude    |
| 18 Gouma      | exclude    | exclude    |

|            |          | Observer 1 |          |
|------------|----------|------------|----------|
|            |          | Agree      | Disagree |
| Observer 2 | Agree    | 7          | 0        |
|            | Disagree | 0          | 11       |

| RCTs                         | Observer 1 | Observer 2 |
|------------------------------|------------|------------|
| First author                 |            |            |
| 1 Csendes <sup>8</sup>       | include    | include    |
| 2 Illig <sup>9</sup>         | include    | include    |
| 3 Higgins <sup>10</sup>      | include    | include    |
| 4 Dobay <sup>11</sup>        | include    | include    |
| 5 Harling <sup>12</sup>      | include    | include    |
| 6 Tocchi <sup>13</sup>       | include    | include    |
| 7 Chen <sup>14</sup>         | include    | include    |
| 8 Shi <sup>15</sup>          | include    | include    |
| 9 Mahatharadol <sup>16</sup> | include    | include    |
| 10 Wang LB <sup>17</sup>     | include    | include    |
| 11 He <sup>18</sup>          | exclude    | exclude    |
| 12 Koc <sup>19</sup>         | include    | include    |
| 13 Hu <sup>20</sup>          | exclude    | include    |
| 14 Chang <sup>21</sup>       | include    | include    |
| 15 Kuthe <sup>22</sup>       | include    | include    |
| 16 Fang <sup>23</sup>        | exclude    | exclude    |
| 17 Wang B <sup>24</sup>      | include    | include    |
| 18 Yildiz <sup>25</sup>      | include    | include    |
| 19 Uludag <sup>26</sup>      | include    | include    |
| 20 Yang <sup>27</sup>        | exclude    | exclude    |
| 21 Gaur <sup>28</sup>        | exclude    | exclude    |
| 22 Sharma <sup>29</sup>      | include    | include    |
| 23 Shah <sup>30</sup>        | include    | include    |
| 24 Naqvi <sup>31</sup>       | include    | include    |
| 25 Turk <sup>32</sup>        | include    | include    |
| 26 Matsui <sup>33</sup>      | include    | include    |
| 27 Regimbeau <sup>34</sup>   | exclude    | include    |
| 28 Ruangsin <sup>35</sup>    | include    | include    |

|            |          | Observer 1 |          |
|------------|----------|------------|----------|
|            |          | Agree      | Disagree |
| Observer 2 | Agree    | 22         | 6        |
|            | Disagree | 24         | 4        |

Superscript numbers indicate reference numbers.

296x420mm (300 x 300 DPI)

1  
2  
3  
4  
5  
6  
7  
8  
9  
10  
11  
12  
13  
14  
15  
16  
17  
18  
19  
20  
21  
22  
23  
24  
25  
26  
27  
28  
29  
30  
31  
32  
33  
34  
35  
36  
37  
38  
39  
40  
41  
42  
43  
44  
45  
46  
47  
48  
49  
50  
51  
52  
53  
54  
55  
56  
57  
58  
59  
60

The table is a complex multi-column grid. It contains various data points, including numerical values, text descriptions, and possibly dates or identifiers. The columns are organized into several distinct sections, likely representing different stages or components of a study or process. The data is presented in a structured, tabular format.

296x209mm (300 x 300 DPI)

View only

Reassessment of data from meta-analyses.

| SSI each study |        |                   |           |            | SSI results                            |        |                  |         |         |                   |
|----------------|--------|-------------------|-----------|------------|----------------------------------------|--------|------------------|---------|---------|-------------------|
| Studies        | RR     | 95%CI             | %W(fixed) | %W(random) | model                                  | RR     | 95%CI            | z       | p-value | method            |
| Csendes        | 1.1000 | [0.1609; 7.5194]  | 2.4%      | 3.4%       | Fixed effect model                     | 0.7095 | [0.5070; 0.9927] | -2.0024 | 0.0452  | Mantel-Haenszel   |
| Illig          | 0.1907 | [0.0092; 3.9314]  | 3.2%      | 1.4%       | Random effect model                    | 0.7545 | [0.5304; 1.0733] | -1.5666 | 0.1172  | DerSimonian-Laird |
| Higgins        | 1.2184 | [0.2395; 6.1992]  | 3.4%      | 4.7%       |                                        |        |                  |         |         |                   |
| Dobay          | NA     |                   | 0.0%      | 0.0%       | Quantifying heterogeneity:             |        |                  |         |         |                   |
| Hartling       | 0.9487 | [0.2042; 4.4068]  | 3.9%      | 5.3%       | $\tau^2 = 0$ ; $I^2 = 0\%$ [0%; 11.6%] |        |                  |         |         |                   |
| Tecchi         | 0.9091 | [0.2433; 3.3966]  | 5.3%      | 7.2%       |                                        |        |                  |         |         |                   |
| Chen           | 0.6550 | [0.1137; 3.7720]  | 3.8%      | 4.1%       | Test of heterogeneity:                 |        |                  |         |         |                   |
| Shi            | 1.7188 | [0.1601; 18.4460] | 1.4%      | 2.2%       | Q d.f. p-value                         |        |                  |         |         |                   |
| Mahatharadol   | 0.3333 | [0.0139; 7.9896]  | 1.9%      | 1.2%       | 11.98 20 0.9167                        |        |                  |         |         |                   |
| Wang LB        | 0.9127 | [0.1559; 5.3420]  | 3.2%      | 4.0%       |                                        |        |                  |         |         |                   |
| Koc            | 0.8776 | [0.0566; 13.6094] | 1.3%      | 1.7%       |                                        |        |                  |         |         |                   |
| Chang          | 0.4823 | [0.0442; 5.2573]  | 2.6%      | 2.2%       |                                        |        |                  |         |         |                   |
| Kuthe          | 0.6625 | [0.0622; 7.0523]  | 2.2%      | 2.2%       |                                        |        |                  |         |         |                   |
| Wang B         | 1.0000 | [0.0634; 15.7669] | 1.3%      | 1.6%       |                                        |        |                  |         |         |                   |
| Yildiz         | 1.3079 | [0.3001; 5.7003]  | 3.8%      | 5.7%       |                                        |        |                  |         |         |                   |
| Uludag         | 1.6765 | [0.2887; 9.7349]  | 2.4%      | 4.0%       |                                        |        |                  |         |         |                   |
| Sharma         | 0.5000 | [0.0959; 2.6074]  | 5.0%      | 4.6%       |                                        |        |                  |         |         |                   |
| Shah           | 0.6753 | [0.2463; 1.8518]  | 11.27     | 12.21      |                                        |        |                  |         |         |                   |
| Naqvi          | 1.1170 | [0.4140; 3.0137]  | 8.92      | 12.61      |                                        |        |                  |         |         |                   |
| Turk           | 1.9353 | [0.3574; 10.4784] | 2.56      | 4.35       |                                        |        |                  |         |         |                   |
| Matsui         | 0.2109 | [0.0723; 0.6158]  | 23.92     | 10.82      |                                        |        |                  |         |         |                   |
| Ruangsri       | 0.3973 | [0.0783; 2.0160]  | 6.32      | 4.71       |                                        |        |                  |         |         |                   |

| Distant infections each study |        |                   |           |            | Distant infections results             |        |                  |         |         |                   |
|-------------------------------|--------|-------------------|-----------|------------|----------------------------------------|--------|------------------|---------|---------|-------------------|
| Studies                       | RR     | 95%CI             | %W(fixed) | %W(random) | model                                  | RR     | 95%CI            | z       | p-value | method            |
| Illig                         | 0.4766 | [0.0438; 5.1886]  | 6.7%      | 9.0%       | Fixed effect model                     | 0.3747 | [0.1914; 0.7333] | -2.8654 | 0.0042  | Mantel-Haenszel   |
| Higgins                       | 0.9747 | [0.0892; 10.6550] | 4.4%      | 9.0%       | Random effect model                    | 0.4475 | [0.2185; 0.9168] | -2.1974 | 0.0280  | DerSimonian-Laird |
| Tecchi                        | 0.3030 | [0.0328; 2.7965]  | 10.3%     | 10.4%      |                                        |        |                  |         |         |                   |
| Shi                           | 0.4297 | [0.0400; 4.6115]  | 7.1%      | 9.1%       | Quantifying heterogeneity:             |        |                  |         |         |                   |
| Chang                         | NA     |                   | 0.0%      | 0.0%       | $\tau^2 = 0$ ; $I^2 = 0\%$ [0%; 65.9%] |        |                  |         |         |                   |
| Wang B                        | 1.0000 | [0.0634; 15.7669] | 3.3%      | 6.8%       |                                        |        |                  |         |         |                   |
| Uludag                        | 0.8941 | [0.2502; 3.1948]  | 15.5%     | 31.7%      | Test of heterogeneity:                 |        |                  |         |         |                   |
| Sharma                        | NA     |                   | 0.0%      | 0.0%       | Q d.f. p-value                         |        |                  |         |         |                   |
| Turk                          | NA     |                   | 0.0%      | 0.0%       | 5.13 6 0.5274                          |        |                  |         |         |                   |
| Matsui                        | 0.1252 | [0.0289; 0.5419]  | 62.6%     | 24.0%      |                                        |        |                  |         |         |                   |

| Overall infections each study |        |                   |           |            | Overall infections results                     |        |                  |         |         |                   |
|-------------------------------|--------|-------------------|-----------|------------|------------------------------------------------|--------|------------------|---------|---------|-------------------|
| Studies                       | RR     | 95%CI             | %W(fixed) | %W(random) | model                                          | RR     | 95%CI            | z       | p-value | method            |
| Illig                         | 0.2385 | [0.0270; 2.1021]  | 5.8%      | 5.4%       | Fixed effect model                             | 0.5034 | [0.3394; 0.7468] | -3.4114 | 0.0006  | Mantel-Haenszel   |
| Higgins                       | 1.1372 | [0.2987; 4.3289]  | 5.7%      | 11.0%      | Random effect model                            | 0.6257 | [0.3580; 1.0937] | -1.6455 | 0.0999  | DerSimonian-Laird |
| Tecchi                        | 0.6494 | [0.2239; 1.8832]  | 10.4%     | 14.3%      |                                                |        |                  |         |         |                   |
| Shi                           | 0.8594 | [0.1807; 4.0863]  | 4.6%      | 9.0%       | Quantifying heterogeneity:                     |        |                  |         |         |                   |
| Chang                         | 0.4823 | [0.0442; 5.2573]  | 2.9%      | 4.6%       | $\tau^2 = 0.2714$ ; $I^2 = 35.6\%$ [0%; 69.3%] |        |                  |         |         |                   |
| Wang B                        | 1.0000 | [0.1431; 3.0237]  | 9.4%      | 15.3%      | Test of heterogeneity:                         |        |                  |         |         |                   |
| Uludag                        | 1.1176 | [0.4131; 3.0237]  | 5.7%      | 8.3%       | Q d.f. p-value                                 |        |                  |         |         |                   |
| Sharma                        | 0.5000 | [0.0959; 2.6074]  | 5.7%      | 8.0%       | 13.98 9 0.1229                                 |        |                  |         |         |                   |
| Turk                          | 1.9353 | [0.3574; 10.4784] | 2.9%      | 8.0%       |                                                |        |                  |         |         |                   |
| Matsui                        | 0.1718 | [0.0729; 0.4049]  | 49.7%     | 17.5%      |                                                |        |                  |         |         |                   |

296x420mm (300 x 300 DPI)

1  
2  
3  
4  
5  
6  
7  
8  
9  
10  
11  
12  
13  
14  
15  
16  
17  
18  
19  
20  
21  
22  
23  
24  
25  
26  
27  
28  
29  
30  
31  
32  
33  
34  
35  
36  
37  
38  
39  
40  
41  
42  
43  
44  
45  
46  
47  
48  
49  
50  
51  
52  
53  
54  
55  
56  
57  
58  
59  
60

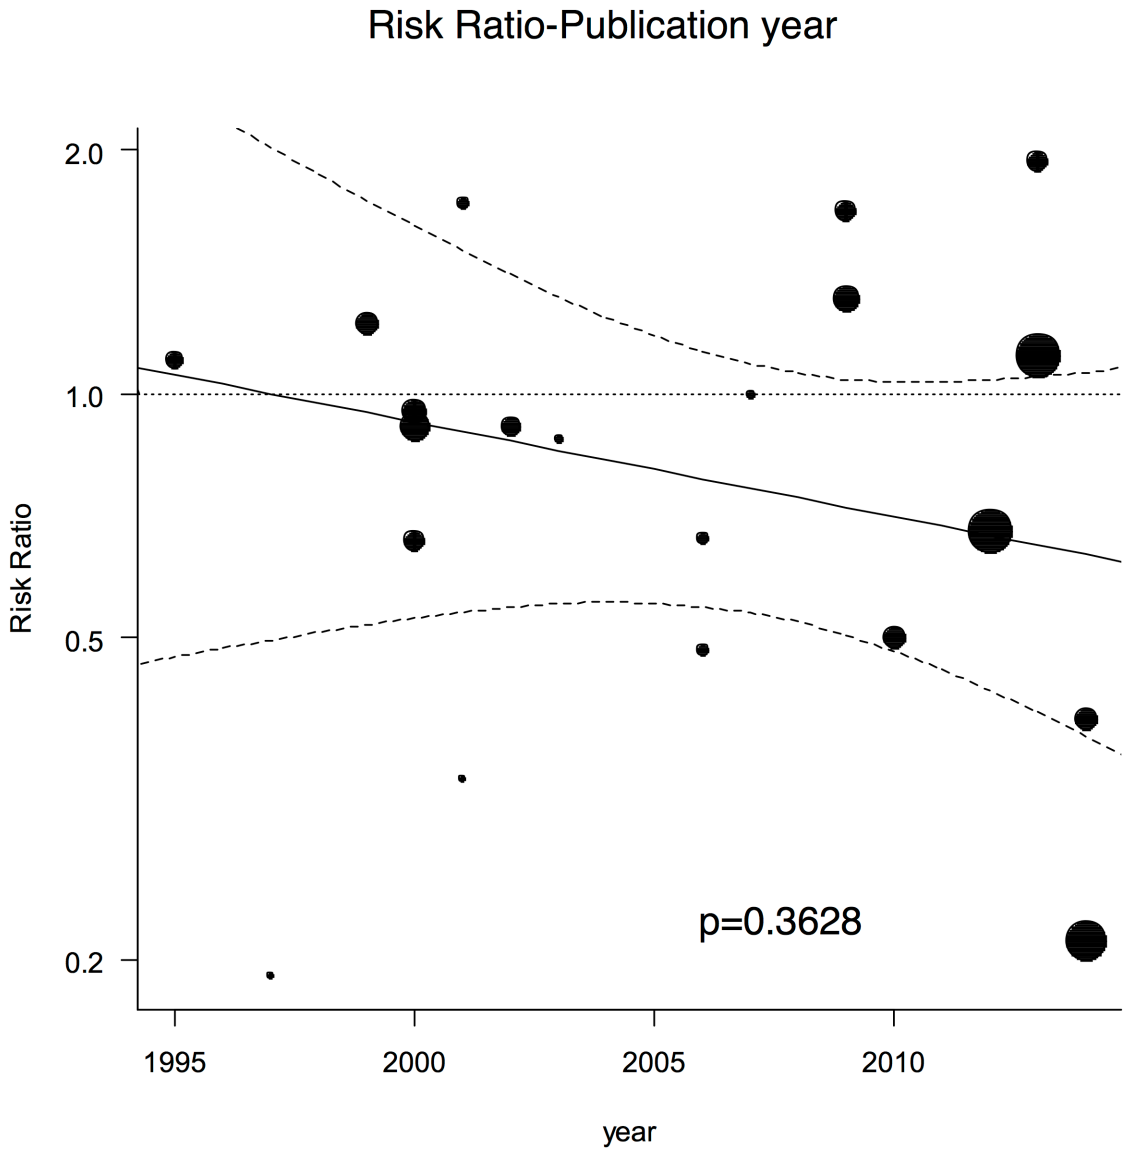

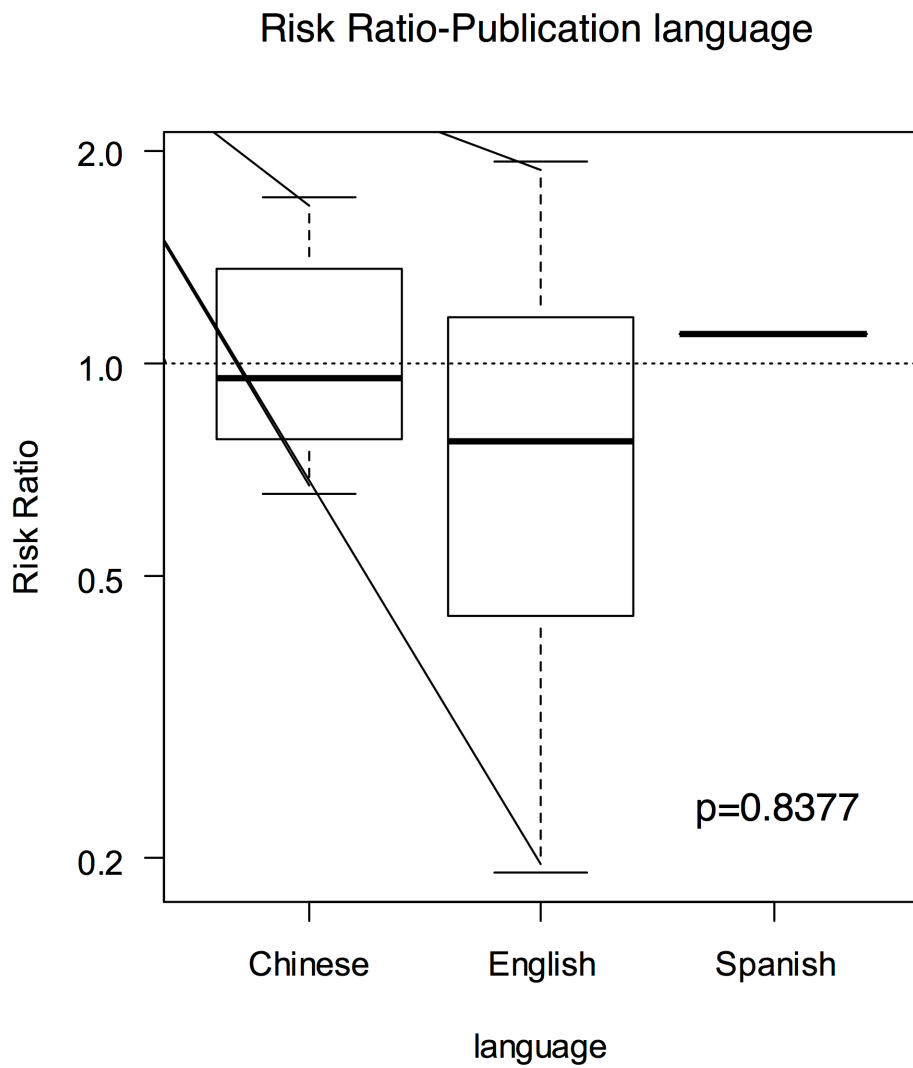



1  
2  
3  
4  
5  
6  
7  
8  
9  
10  
11  
12  
13  
14  
15  
16  
17  
18  
19  
20  
21  
22  
23  
24  
25  
26  
27  
28  
29  
30  
31  
32  
33  
34  
35  
36  
37  
38  
39  
40  
41  
42  
43  
44  
45  
46  
47  
48  
49  
50  
51  
52  
53  
54  
55  
56  
57  
58  
59  
60

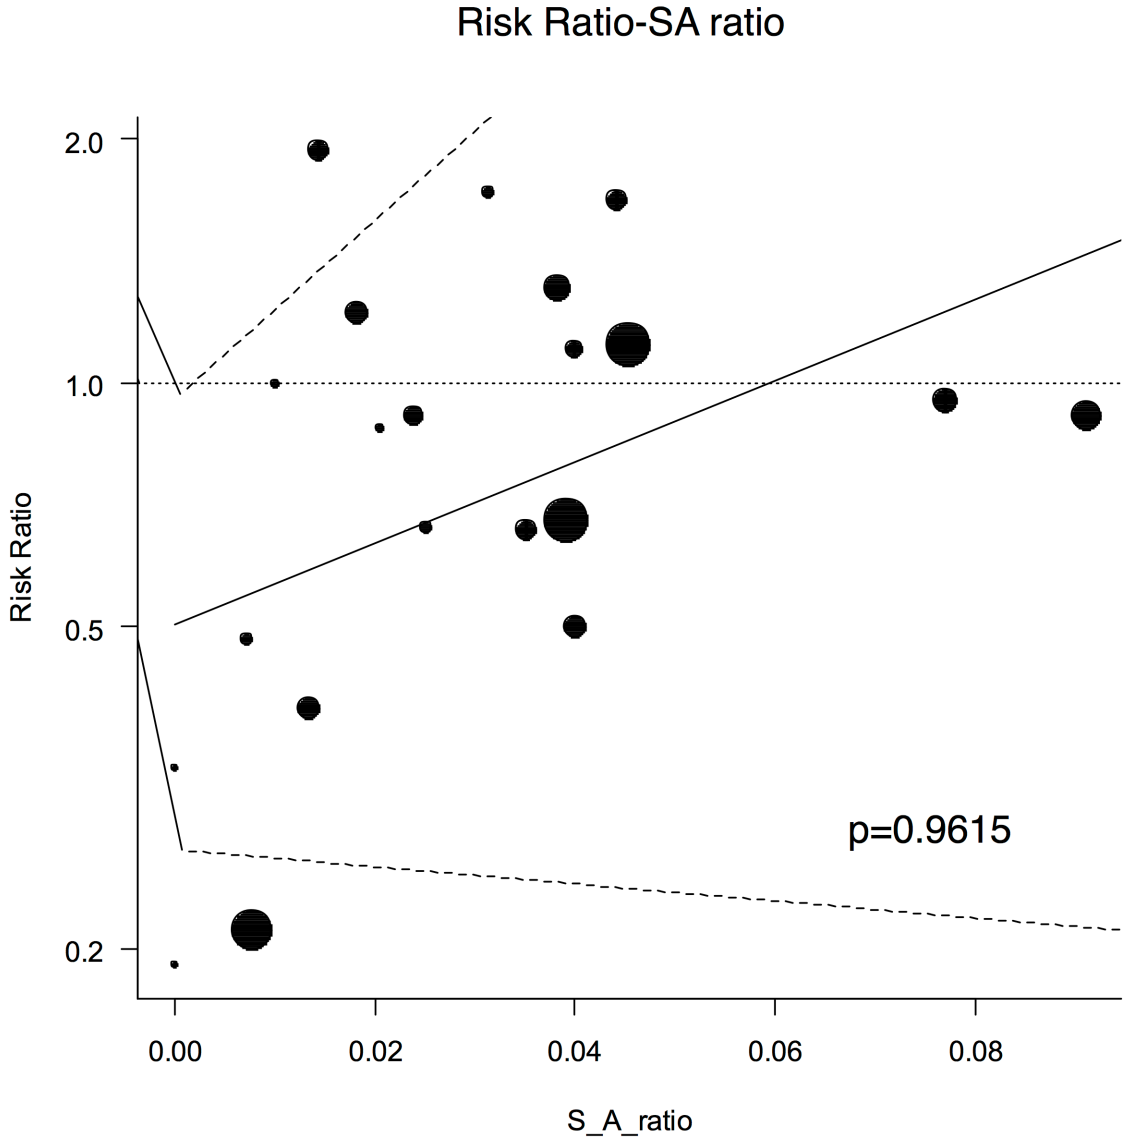

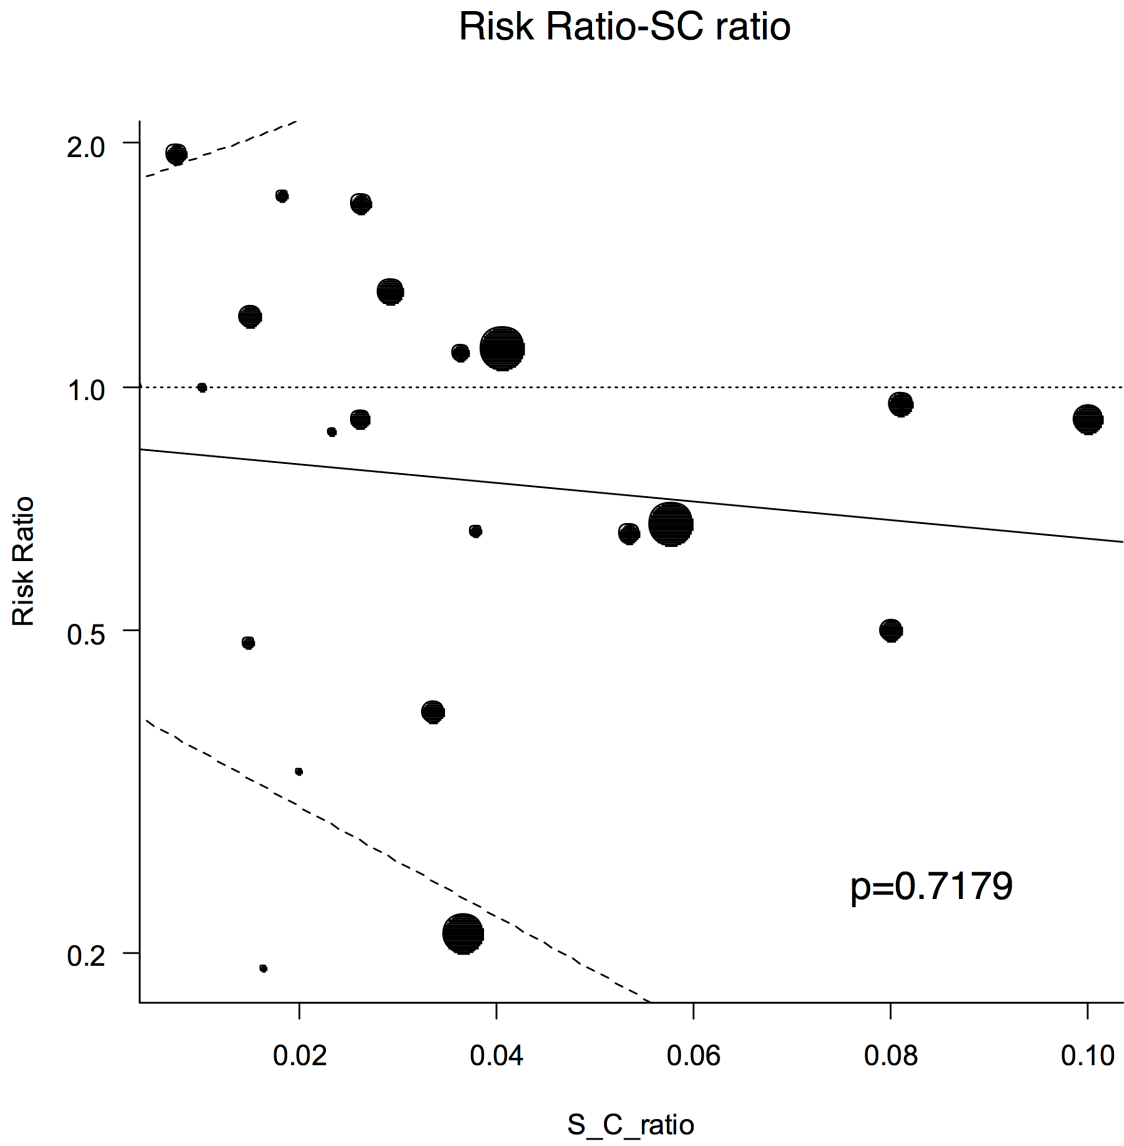

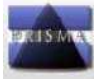

## PRISMA 2009 Checklist

| Section/topic                      | #  | Checklist item                                                                                                                                                                                                                                                                                              | Reported on page # |
|------------------------------------|----|-------------------------------------------------------------------------------------------------------------------------------------------------------------------------------------------------------------------------------------------------------------------------------------------------------------|--------------------|
| <b>TITLE</b>                       |    |                                                                                                                                                                                                                                                                                                             |                    |
| Title                              | 1  | Identify the report as a systematic review, meta-analysis, or both.                                                                                                                                                                                                                                         | 1                  |
| <b>ABSTRACT</b>                    |    |                                                                                                                                                                                                                                                                                                             |                    |
| Structured summary                 | 2  | Provide a structured summary including, as applicable: background; objectives; data sources; study eligibility criteria, participants, and interventions; study appraisal and synthesis methods; results; limitations; conclusions and implications of key findings; systematic review registration number. | 2-4                |
| <b>INTRODUCTION</b>                |    |                                                                                                                                                                                                                                                                                                             |                    |
| Rationale                          | 3  | Describe the rationale for the review in the context of what is already known.                                                                                                                                                                                                                              | 5,6                |
| Objectives                         | 4  | Provide an explicit statement of questions being addressed with reference to participants, interventions, comparisons, outcomes, and study design (PICOS).                                                                                                                                                  | 5,6                |
| <b>METHODS</b>                     |    |                                                                                                                                                                                                                                                                                                             |                    |
| Protocol and registration          | 5  | Indicate if a review protocol exists, if and where it can be accessed (e.g., Web address), and, if available, provide registration information including registration number.                                                                                                                               | -                  |
| Eligibility criteria               | 6  | Specify study characteristics (e.g., PICOS, length of follow-up) and report characteristics (e.g., years considered, language, publication status) used as criteria for eligibility, giving rationale.                                                                                                      | 6-8                |
| Information sources                | 7  | Describe all information sources (e.g., databases with dates of coverage, contact with study authors to identify additional studies) in the search and date last searched.                                                                                                                                  | 6, S1, S2, S3      |
| Search                             | 8  | Present full electronic search strategy for at least one database, including any limits used, such that it could be repeated.                                                                                                                                                                               | 6-8                |
| Study selection                    | 9  | State the process for selecting studies (i.e., screening, eligibility, included in systematic review, and, if applicable, included in the meta-analysis).                                                                                                                                                   | 6, S1, S2          |
| Data collection process            | 10 | Describe method of data extraction from reports (e.g., piloted forms, independently, in duplicate) and any processes for obtaining and confirming data from investigators.                                                                                                                                  | 6, S1, S2          |
| Data items                         | 11 | List and define all variables for which data were sought (e.g., PICOS, funding sources) and any assumptions and simplifications made.                                                                                                                                                                       | 6-8                |
| Risk of bias in individual studies | 12 | Describe methods used for assessing risk of bias of individual studies (including specification of whether this was done at the study or outcome level), and how this information is to be used in any data synthesis.                                                                                      | 8,9, S5            |
| Summary measures                   | 13 | State the principal summary measures (e.g., risk ratio, difference in means).                                                                                                                                                                                                                               | 8,9, S5            |

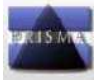

## PRISMA 2009 Checklist

|                      |    |                                                                                                                                                           |         |
|----------------------|----|-----------------------------------------------------------------------------------------------------------------------------------------------------------|---------|
| Synthesis of results | 14 | Describe the methods of handling data and combining results of studies, if done, including measures of consistency (e.g., $I^2$ ) for each meta-analysis. | 8,9, S4 |
|----------------------|----|-----------------------------------------------------------------------------------------------------------------------------------------------------------|---------|

Page 1 of 2

| Section/topic                 | #  | Checklist item                                                                                                                                                                                           | Reported on page # |
|-------------------------------|----|----------------------------------------------------------------------------------------------------------------------------------------------------------------------------------------------------------|--------------------|
| Risk of bias across studies   | 15 | Specify any assessment of risk of bias that may affect the cumulative evidence (e.g., publication bias, selective reporting within studies).                                                             | 8,9, S5            |
| Additional analyses           | 16 | Describe methods of additional analyses (e.g., sensitivity or subgroup analyses, meta-regression), if done, indicating which were pre-specified.                                                         | S5                 |
| <b>RESULTS</b>                |    |                                                                                                                                                                                                          |                    |
| Study selection               | 17 | Give numbers of studies screened, assessed for eligibility, and included in the review, with reasons for exclusions at each stage, ideally with a flow diagram.                                          | 9, Fig1, S1, S2    |
| Study characteristics         | 18 | For each study, present characteristics for which data were extracted (e.g., study size, PICOS, follow-up period) and provide the citations.                                                             | 9-11, S3           |
| Risk of bias within studies   | 19 | Present data on risk of bias of each study and, if available, any outcome level assessment (see item 12).                                                                                                | 14, S5             |
| Results of individual studies | 20 | For all outcomes considered (benefits or harms), present, for each study: (a) simple summary data for each intervention group (b) effect estimates and confidence intervals, ideally with a forest plot. | 9-14, Fig4, S5     |
| Synthesis of results          | 21 | Present results of each meta-analysis done, including confidence intervals and measures of consistency.                                                                                                  | 10-15              |
| Risk of bias across studies   | 22 | Present results of any assessment of risk of bias across studies (see Item 15).                                                                                                                          | 14, S5             |
| Additional analysis           | 23 | Give results of additional analyses, if done (e.g., sensitivity or subgroup analyses, meta-regression [see Item 16]).                                                                                    | 13-15, S3, S4, S5  |
| <b>DISCUSSION</b>             |    |                                                                                                                                                                                                          |                    |
| Summary of evidence           | 24 | Summarize the main findings including the strength of evidence for each main outcome; consider their relevance to key groups (e.g., healthcare providers, users, and policy makers).                     | 16-18              |
| Limitations                   | 25 | Discuss limitations at study and outcome level (e.g., risk of bias), and at review-level (e.g., incomplete retrieval of identified research, reporting bias).                                            | 18,19              |
| Conclusions                   | 26 | Provide a general interpretation of the results in the context of other evidence, and implications for future research.                                                                                  | 18,19              |
| <b>FUNDING</b>                |    |                                                                                                                                                                                                          |                    |

1  
2  
3  
4  
5  
6  
7  
8  
9  
10  
11  
12  
13  
14  
15  
16  
17  
18  
19  
20  
21  
22  
23  
24  
25  
26  
27  
28  
29  
30  
31  
32  
33  
34  
35  
36  
37  
38  
39  
40  
41  
42  
43  
44  
45  
46  
47

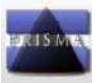

# PRISMA 2009 Checklist

|         |    |                                                                                                                                            |    |
|---------|----|--------------------------------------------------------------------------------------------------------------------------------------------|----|
| Funding | 27 | Describe sources of funding for the systematic review and other support (e.g., supply of data); role of funders for the systematic review. | 20 |
|---------|----|--------------------------------------------------------------------------------------------------------------------------------------------|----|

From: Moher D, Liberati A, Tetzlaff J, Altman DG, The PRISMA Group (2009). Preferred Reporting Items for Systematic Reviews and Meta-Analyses: The PRISMA Statement. PLoS Med 6(7): e1000097. doi:10.1371/journal.pmed1000097

For more information, visit: [www.prisma-statement.org](http://www.prisma-statement.org).

Page 2 of 2

For peer review only
