# Supplementary material for: Reappraisal of previously reported meta-analyses on antibiotic prophylaxis for low-risk laparoscopic cholecystectomy: an overview of systematic reviews
Source: PubMed Central journal article supplement — BMJ Open. 2018 Mar 16;8(3):e016666. doi: 10.1136/bmjopen-2017-016666 (PMC5857705; doi:10.1136/bmjopen-2017-016666), 2018-03-16

### Risk Ratio-Publication year

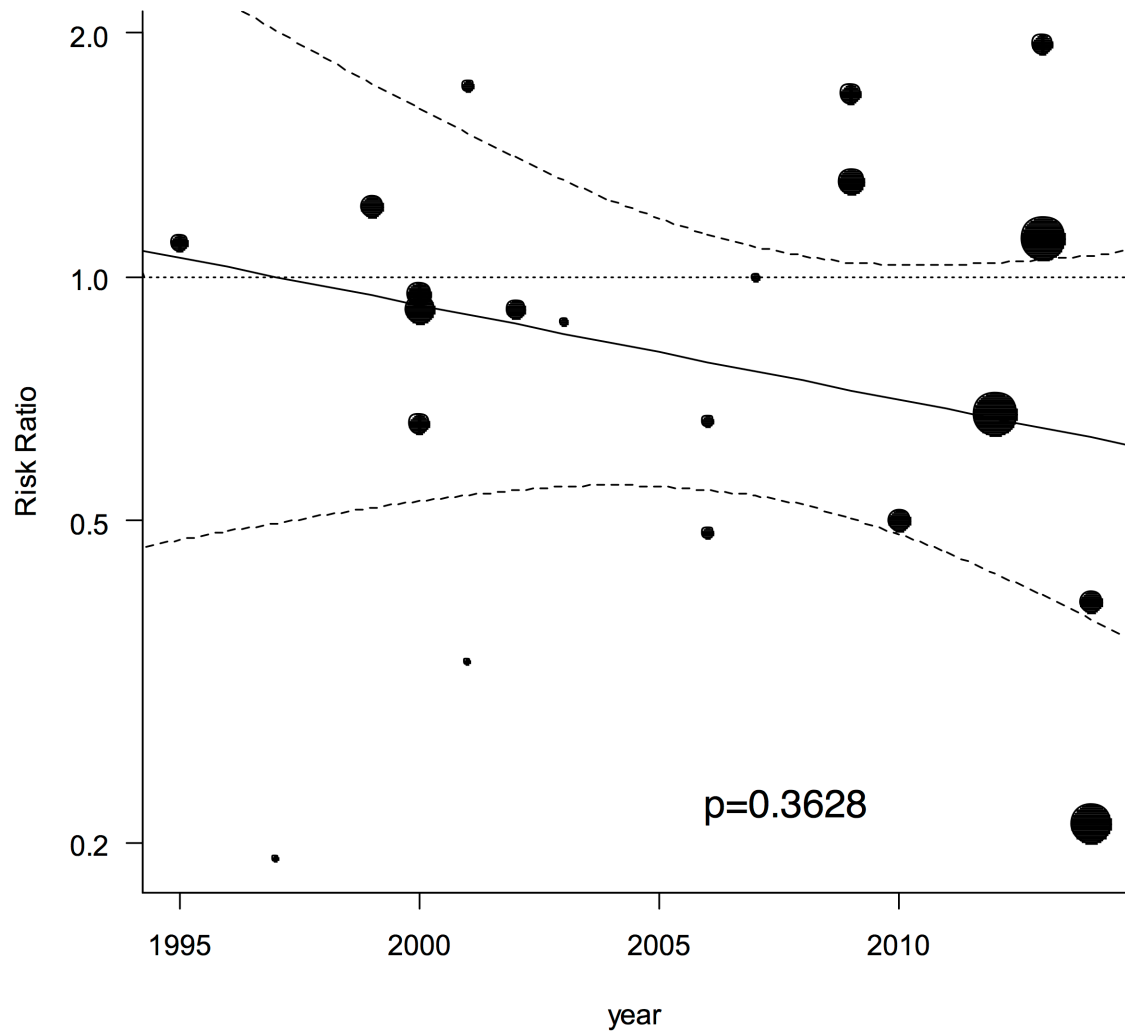

Risk Ratio-Publication language

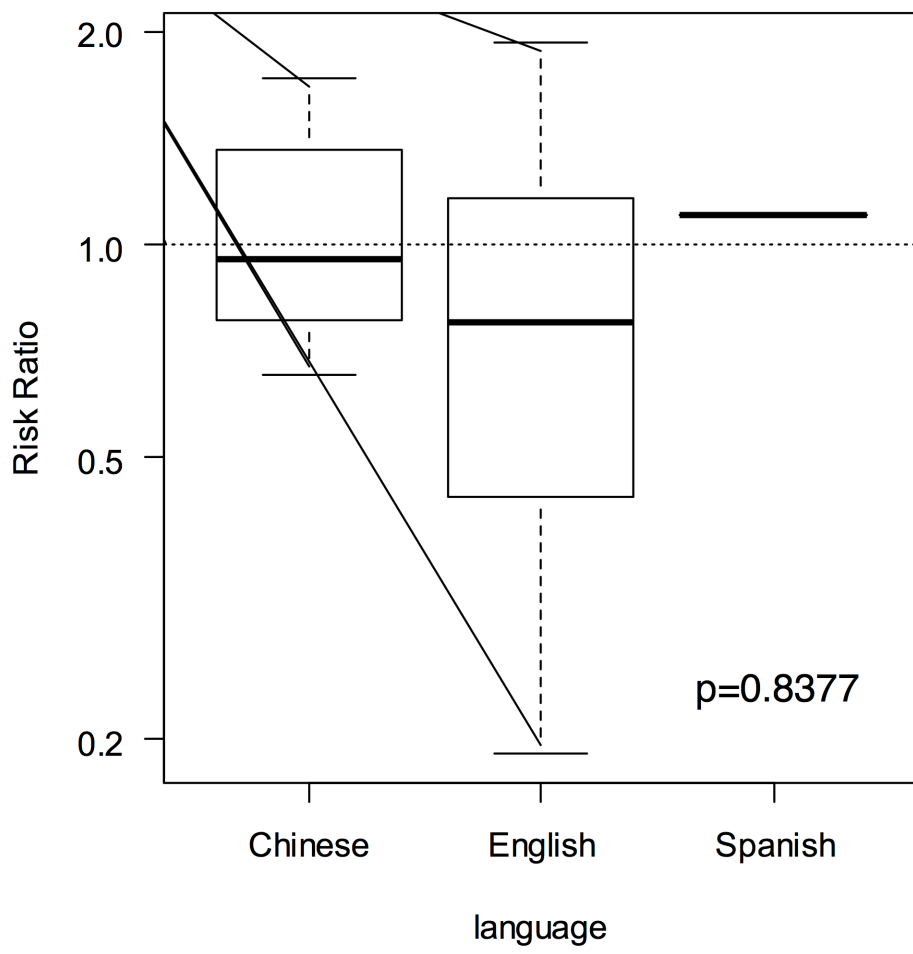

Risk Ratio-SA ratio

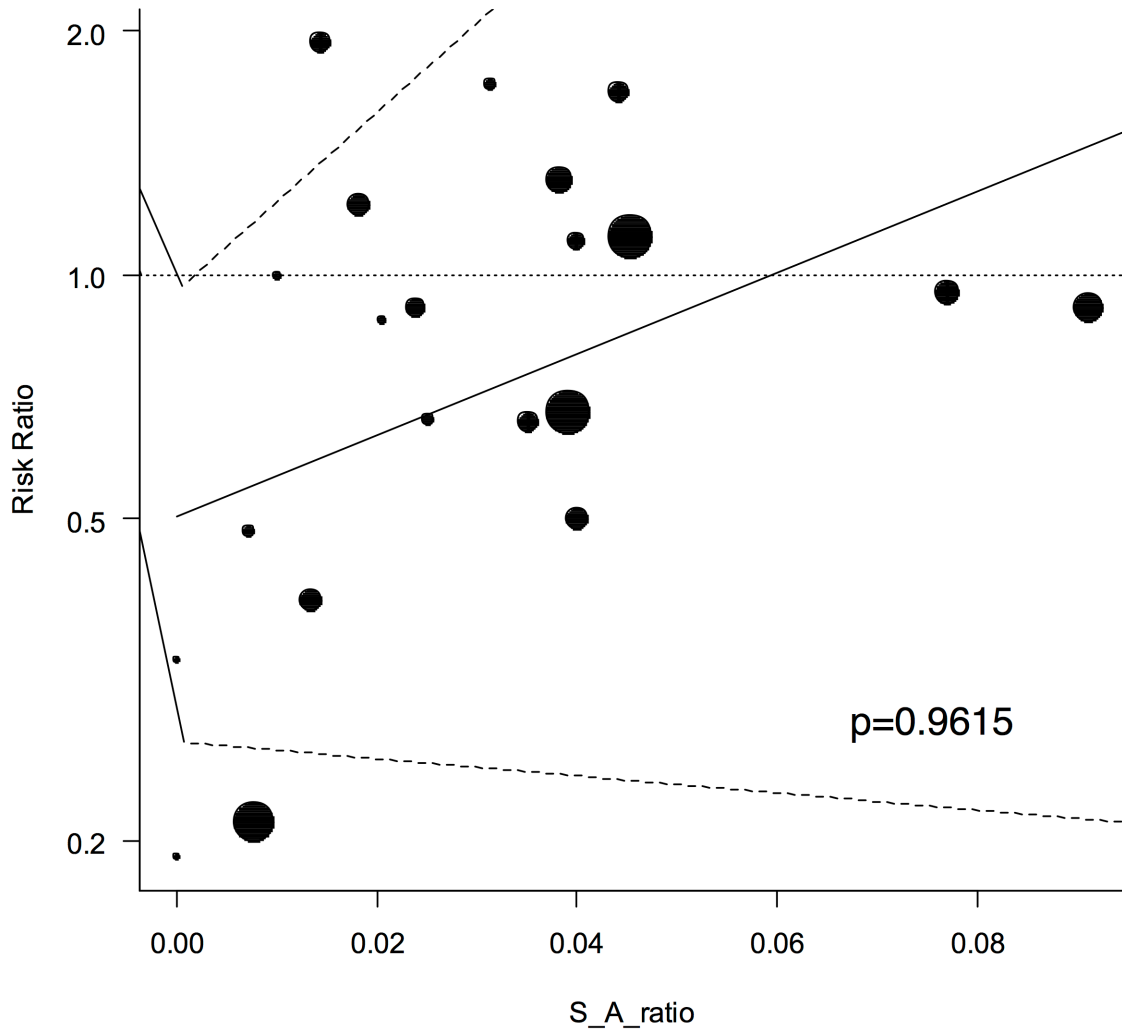

# Risk Ratio-SC ratio

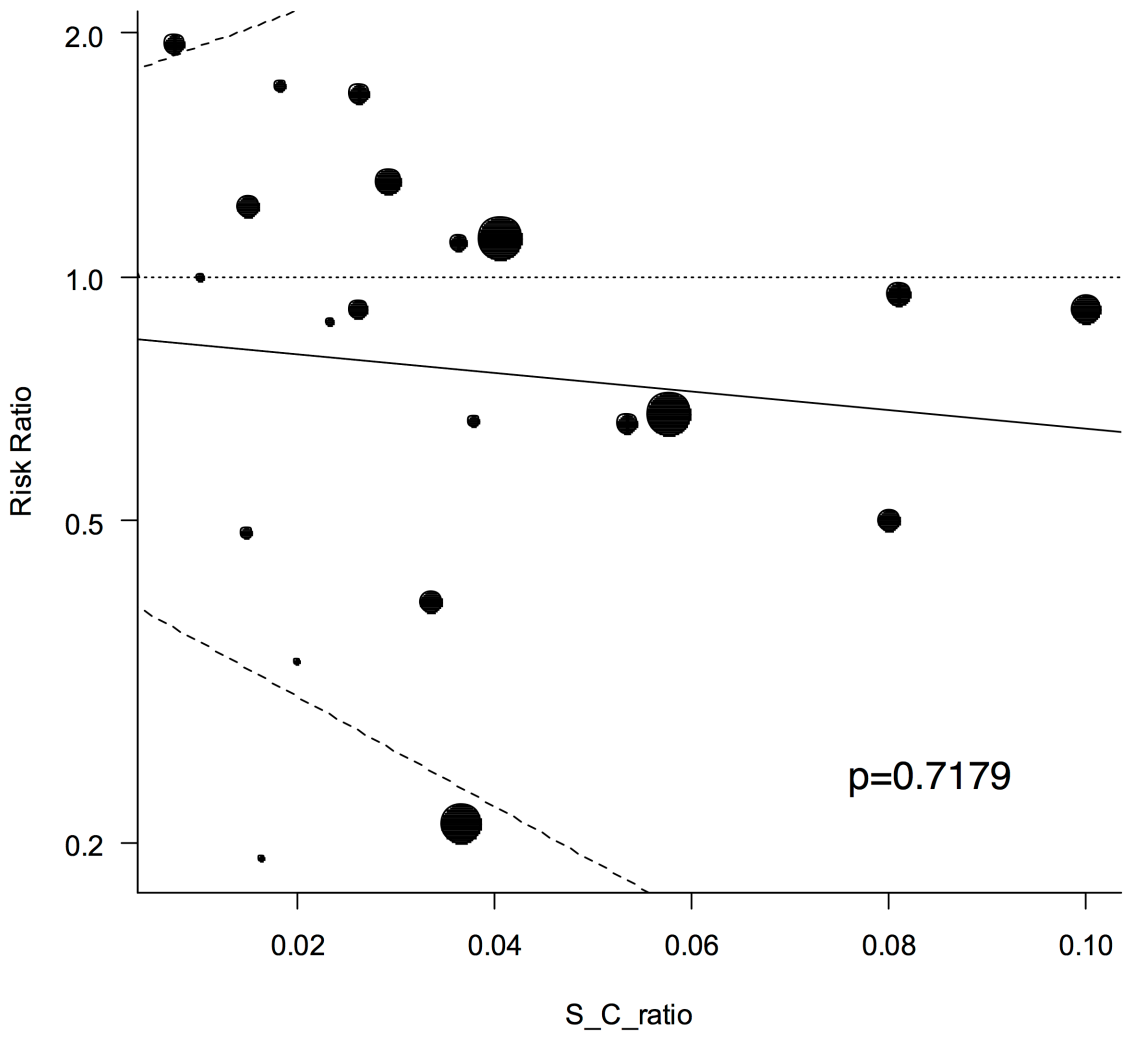

Supplement: bmjopen-2017-016666supp005.pdf [file bmjopen-2017-016666supp005.pdf]
